19 Tanshi Li, E-mail: lts301@163.com. Department of Emergency, Chinese PLA General Hospital,  
20 Beijing, 100853, China.

21 Zhengbo Zhang, Email: zhengbozhang@126.com. Department of Biomedical Engineering and  
22 Maintenance Center, Chinese PLA General Hospital, Beijing, 100853, China.

### 23 **Funding:**

24 There is no financial funding or interest to report.

### 25 **Take-home Message:**

26 A real-time early warning system for forecasting the onset of acute kidney injury (AKI) within  
27 the first week of intensive care unit (ICU) stay in adult intensive care has been developed and  
28 validated in two general populations, which considering both urine output and serum creatinine  
29 diagnostic criteria and learned with machine learning models.

### 30 **Author Contributions:**

31 SH, CF designed the study, conducted the data collection, data analysis, data interpretation, and  
32 wrote the manuscript. SH, CF conducted the data analysis, data interpretation and wrote the  
33 manuscript. LC and WW conducted the data interpretation and reviewed the manuscript. ZZ and  
34 TL designed the study and reviewed the manuscript. KL, LW, and XC conducted the data  
35 interpretation and reviewed the manuscript.

### 36 **Conflicts of Interest**

37 The authors declare that they have no conflict of interest.

38 **Abstract**

39 **Background:** To improve the performance of early acute kidney injury (AKI) prediction in  
40 intensive care unit (ICU), we developed and externally validated machine learning algorithms in  
41 two large ICU databases.

42 **Methods:** Using eICU<sup>®</sup> Collaborative Research Database (eICU) and MIMIC-III databases, we  
43 selected all adult patients (age  $\geq 18$ ). The detection of AKI was based on both the oliguric and  
44 serum creatinine criteria of the KDIGO (Kidney Disease Improving Global Outcomes). We  
45 developed an early warning system for forecasting the onset of AKI within the first week of ICU  
46 stay, by using 6- or 12-hours as the data extraction window and make a prediction within a 1-  
47 hour window after a gap window of 6- or 12-hours. We used 52 features which are routinely  
48 available ICU data as predictors. eICU was used for model development, and MIMIC-III was  
49 used for externally validation. We applied and experimented on eight machine learning  
50 algorithms for the prediction task.

51 **Results:** 3,816 unique admissions in multi-center eICU database were selected for model  
52 development, and 5,975 unique admissions in single-center MIMIC-III database were selected  
53 for external validation. The incidence of AKI within the first week of ICU stay in eICU and  
54 MIMIC-III cohorts was 52.1% (n=1,988) and 31.3% (n=1,870), respectively. In eICU cohort, the  
55 performance of AKI prediction is better with shorter extraction window and gap window. We  
56 found that the AdaBoost algorithm yielded the highest AUC (0.8859) on the model with 6-hours  
57 data extraction window and 6-hours gap window (model 6-6) rather than other prediction models.  
58 In MIMIC-III cohort, AdaBoost also performed well.

59 **Conclusions:** We developed the machine learning-based early AKI prediction model, which  
60 considered clinical important features and has been validated in two datasets.

61 **Keywords:** Acute Kidney Injury; Intensive Care Unit; Artificial Intelligence; Machine Learning

## 62 **Background**

63 Acute kidney injury (AKI) is the major cause of multiple organ failure with an incidence more  
64 than 50% in critically ill patients<sup>1-5</sup>. Early prevention as one of the limited management options  
65 could greatly improve the prognosis of AKI in the intensive care unit (ICU) and therefore the  
66 early identification of critical patients with AKI becomes a critical issue, which could offer an  
67 opportunity to develop strategies for early prevention and intervention of AKI in critical care<sup>6-9</sup>.  
68 The available dataset of large electronic healthcare records (EHR) provide an opportunity of  
69 predicting the early onset of AKI in critical care patients using machine learning algorithms,  
70 which can provide a much earlier, applicable and cost-effective solution than current late  
71 diagnostic criteria and biomarkers with limited utilities<sup>6, 10-18</sup>.

72 Forecasting the onset of AKI was well-studied in previous. Some studies have reported  
73 that their AKI prediction models were desirable. However, deploying such methods to the real  
74 world would be relatively difficult due to several critical limitations<sup>19-21</sup>: (1) Some prediction  
75 models were based on highly specific cohorts, such as cardiac disease and post-surgery cohorts,  
76 which lack of the general hospital population background, thus need to be further explored<sup>22-27</sup>.  
77 (2) The definitions of AKI in some studies were based on the serum creatinine (SCr) criteria  
78 without oliguria criteria. Even though oliguria criteria is non-early and non-specific, some  
79 studies have already confirmed that nearly one-third of AKI patients in ICU were identified by  
80 oliguria criteria and without elevating SCr<sup>26-36</sup>. Some of the previous study such as Tomašev *et al.*  
81 2019 were due to the lack of urine output information. (3) Those prediction tasks simply rely on  
82 a single time point, which is the time of admission to hospital, due to data insufficiency<sup>26, 27, 31, 32,</sup>  
83 <sup>37-40</sup>. (4) Many studies did not include physiological or laboratory parameters as predictors,  
84 especially urine output, which has been confirmed as a critical role in predicting AKI and ICU

85 mortality<sup>26, 27, 34, 35, 41</sup>. (5) The explored machine learning methods and selected features in the  
86 studies were limited, which may not fully take the advantage of machine learning techniques  
87 based on “big healthcare data” as well as investigating the best model performance<sup>26, 31-36, 39, 40, 42</sup>.  
88 For example, Tomašev *et al.* 2019 developed a deep learning approach for the continuous risk  
89 prediction of AKI, but they did not compare their approach with other baseline algorithms such  
90 as basic neural networks or other ensemble algorithms. (6) Many studies did not perform  
91 external validation or not considering the real-world deployment<sup>26, 31-36, 40, 43-47</sup>.

92 To overcome the above limitations, we utilized a large multi-center ICU database (eICU  
93 Collaborative Research Database (v1.2)) and used both oliguria and SCr diagnostic criteria of  
94 Kidney Disease Improving Global Outcomes (KDIGO)<sup>14</sup> as the definition of AKI, and included  
95 most of the routinely available physiological and laboratory parameters in ICU and clinical  
96 interventions as predictors. We then adopted eight machine learning algorithms to conduct  
97 experiments and develop the comparable models of predicting the early onset of AKI within the  
98 first week of ICU stay. We also used another large non-overlapping single-center MIMIC-III  
99 (Medical Information Mart for Intensive Care III (v1.4)) ICU database for external validation.  
100 By fully utilizing the existed databases, we evaluated four time series models in an artificial  
101 intelligence perspective. The most important clinical features are also identified by feature  
102 importance analysis.

103

## 104 **Methods**

### 105 **Study Design and Databases**

106 We developed an early warning model for prediction the onset of AKI based on the retrospective  
107 analysis of the multi-center eICU database. The database including 459 ICUs from 58 hospitals  
108 during 2003–2016 in the United States<sup>48, 49</sup>. The model was externally validated on a single-  
109 center publicly available ICU database (MIMIC-III database), which contains 5 different ICUs in  
110 a tertiary medical center (Beth Israel Deaconess Medical Center, BIDMC; Boston,  
111 Massachusetts) during 2001–2012<sup>50, 51</sup>.

## 112 **Study Cohorts**

113 All patients in the publically available eICU (v1.2) and MIMIC-III (v1.4) databases were  
114 considered in this study. The inclusion criteria are as follows: 1) Age  $\geq$  18 years old<sup>52</sup>; 2) ICU  
115 stay for at least 24 consecutive hours; and 3) The first ICU admission of the first hospitalization  
116 were used<sup>53</sup>. The exclusion criteria are as follows: 1) The primary diagnosis contained “Kidney  
117 disease”, “Acute renal failure”, and “Renal obstruction”; 2) clinical history of end-stage renal  
118 disease (ESRD) or their SCr was  $\geq$ 4 mg/dl within the first 24 hours of ICU admission<sup>26</sup>; 3)  
119 Received renal replacement therapy (RRT) within the first 24 hours of ICU admission<sup>54</sup>; 4)  
120 diagnosed as AKI based on oliguria diagnostic criteria within the first 24 hours of ICU admission  
121<sup>54, 55</sup>; 5) Withdrawal of treatment (which contains patients who did not receive mechanical  
122 ventilation and died during ICU stay); 6) samples with any missing value after imputation<sup>53</sup>.

## 123 **AKI Definition**

124 The detection of AKI in adults was based on the oliguric and SCr criteria of the KDIGO<sup>56</sup>. The  
125 “baseline” of SCr was defined as the ICU admission.<sup>32, 37, 38, 57, 58</sup>. The oliguric criteria is based  
126 on the urine output  $<$ 0.5 ml/kg/h for more than 6 hours or 12 hours, or the urine output  $<$ 0.3  
127 ml/kg/h for 24 hours<sup>56</sup>.

## 128 **Prediction Task and Outcomes**

129 The prediction target or the primary outcome of this study was the first onset of AKI at any stage  
130 within the first week of ICU stay<sup>31, 52, 53</sup>. We used 6 or 12 hours<sup>54, 55, 59</sup> as the feature collecting  
131 window, since the urine output based diagnostic criteria of KDIGO relies on 6 or 12 consecutive  
132 hours, and we make a one-hour prediction window after a gap window of 6 or 12 hours. That is,  
133 we used 6 or 12 hours of data to forecast the onset of AKI after 6 or 12 hours. All features and  
134 labels are extracted at one-hour interval for time-series modeling (Figure 1). Although sampled  
135 in one-hour, forecasting the future onset of AKI is a continuous prediction over the time.

136 In detail, we experimented four configurations of time-series models. The configurations  
137 are described as follow with model name and the hours of feature collecting window – the hours  
138 of gap window – the hours of prediction window, respectively.

- 139 1) Model 6-6: 6h-6h-1h;
- 140 2) Model 6-12: 6h-12h-1h;
- 141 3) Model 12-6: 12h-6h-1h;
- 142 4) Model 12-12: 12h-12h-1h.

143 Secondary outcomes of the study included ICU mortality, initial sequential organ failure  
144 assessment (ISOFA) score, need for renal replacement therapy (RRT) and ICU length of stay  
145 (LOS)<sup>31, 52, 53</sup>. The prediction task and different models are shown in Figure 2.



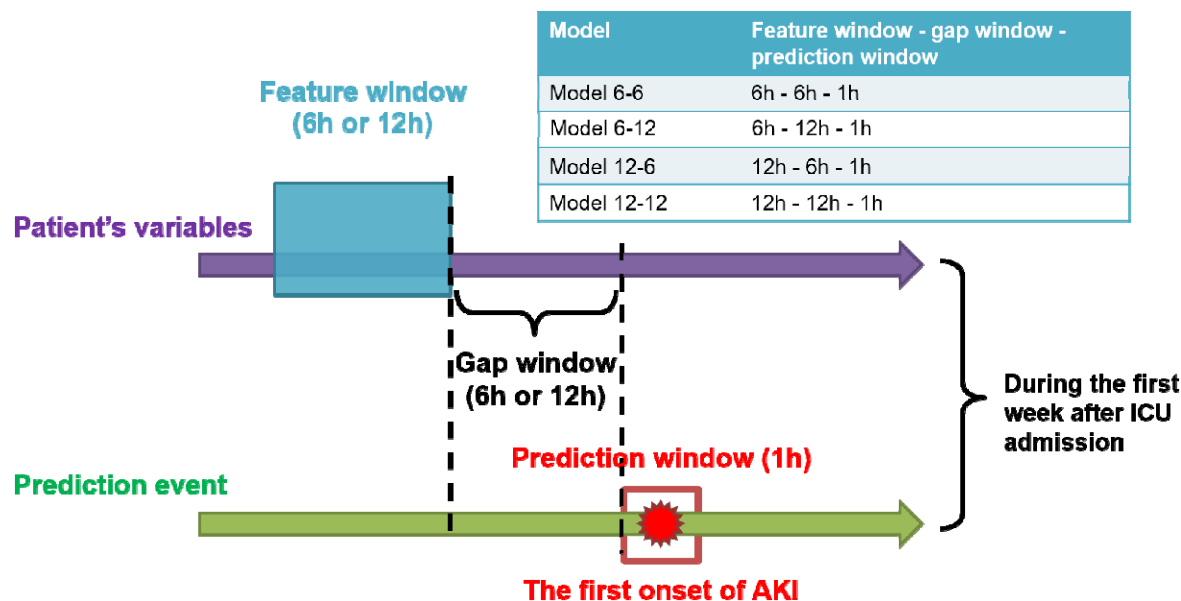

146

147 Figure 1. Model settings and prediction for a single admission. Timestamp is at one-hour interval.

148 Feature collecting window are the discretized time-series features (6 hours or 12 hours) as inputs

149 of machine learning algorithms for predicting the label of AKI after certain gaps (6 hours or 12

150 hours). We experimented on four different model configurations: model 6-6, model 6-12, model

151 12-6, and model 12-12.

152

### 153 **Model Comparison and Feature Importance Ranking**

154 The violin plot<sup>60</sup> and pairwise paired t-test (two sided)<sup>61</sup> were used to visualize and evaluate the

155 performances across four different configurations of our time-series models (model 6-12; model

156 6-6; model 12-12, and model 12-6). Gini importance<sup>62</sup>, also known as the mean decrease

157 impurity, is averaged over all trees of the ensemble model, which was used for identifying and

158 ranking feature importance. Gini importance is calculated by scikit-learn packages<sup>63</sup>.

159

## 160 **Feature Examination and Secondary Outcomes**

161 We used “psych” package<sup>64</sup> to further examine the association between ICU mortality, length of  
162 stay (LOS), need for renal replacement therapy (RRT), and the occurrence of AKI in the first  
163 week to obtain the secondary outcomes, since these features were collected after the onset of  
164 AKI and not showed in Table 1. Moreover, ISOFA score was also included into secondary  
165 outcomes. Continuous features are shown as the mean with standard deviation (s.d.) or median  
166 with interquartile range (IQR). Categorical features are expressed as absolute (n) and relative (%)  
167 frequency. Selected features were analyzed by the Spearman  $\rho$  correlation test (two-sided),  
168 where the Spearman  $\rho$  statistic is used to estimate a rank-based measure of association. The test  
169 is a non-parametric and distribution-free test, thus the data do not necessarily follow a bivariate  
170 normal distribution<sup>65</sup>. The significance was considered when  $P < 0.05$ . Statistical analysis was  
171 performed by Python 3.7 and R version 3.5.1.

172

## 173 **Data Extraction and Pre-processing**

### 174 **Predictors**

175 For each patient, we extracted most of the routinely available ICU data as predictors based on  
176 methods of previous studies<sup>31, 42, 54, 59, 66</sup> and the availability in the selected databases. We  
177 included following features: 1) 18 static variables of demographic information, primary  
178 diagnosis and comorbidities (*e.g.*, age, gender, sepsis, hypertension, etc.). The primary diagnosis  
179 were identified at the ICU admission from the databases; 2) 31 time-varying variables of vital  
180 signs, laboratory values and fluid balance-related parameters (*e.g.*, heart rate, oxygen saturation,  
181 white blood cell count, blood creatinine, fluids intake, urine output, etc.); 3) two critical

182 interventions, which are usages of mechanical ventilation and vasopressors; 4) two other  
 183 variables: “Hours” (hours stayed in ICU) and Initial SOFA (ISOFA). The complete feature list is  
 184 shown in Table 1, detailed feature selection criteria are listed in Table S1.

185 It is worth to know that those variables also include urine output and serum creatinine  
 186 (SCr), the same two variables which were used to define the onset of AKI based on KDIGO<sup>56</sup>.  
 187 In time series analysis, these two variables are known as endogenous variables while other  
 188 variables are served as exogenous variables<sup>67, 68</sup>. Though the definition of AKI is based on urine  
 189 output and SCr, forecasting the onset of AKI after 6 or 12 hours gap window cannot base on the  
 190 future unseen urine output and SCr. Thus, complex machine learning algorithms are involved  
 191 into this forecasting problem.

| Groups                  | Variables              |                            |                       |                                    |                                  |                               |                          |
|-------------------------|------------------------|----------------------------|-----------------------|------------------------------------|----------------------------------|-------------------------------|--------------------------|
| Demographic information | Age                    | Gender                     | Ethnicity             | Height                             | Weight                           | BMI <sup>1</sup>              |                          |
| Vital signs             | Temperature (TEM)      | Heart rate (HR)            | Respiratory rate (RR) | Diastolic blood pressure (DIAS_BP) | Systolic blood pressure (SYS_BP) | Mean blood pressure (MEAN_BP) | Oxygen saturation (SPO2) |
| Laboratory values       | Sodium (NA_ION)        | Calcium (CA_ION)           | Potassium (K_ION)     | Chloride (CL_ION)                  | Anion gap (AG)                   | Glucose (GLU)                 | Bicarbonate (HCO3)       |
|                         | White blood cell count | Red blood cell count (RBC) | Hemoglobin (HGB)      | Hematocrit (HCT)                   | Platelets (PLT)                  | P_F_ratio <sup>2</sup> (PF)   |                          |

|                                                |                                        |                                          |                                          |                                        |                                          |                                          |
|------------------------------------------------|----------------------------------------|------------------------------------------|------------------------------------------|----------------------------------------|------------------------------------------|------------------------------------------|
|                                                | (WBC)                                  |                                          |                                          |                                        |                                          |                                          |
|                                                | Glutamic pyruvic transaminase (ALT)    | Glutamic oxalacetic transaminase (AST)   | Total bilirubin (TBB)                    | Blood urea nitrogen (UN)               | Serum creatinine (SCr)                   |                                          |
| Fluid balance                                  | Fluids intake last 6 hours (INPUT_6HR) | Fluids intake last 12 hours (INPUT_12HR) | Fluids intake last 24 hours (INPUT_24HR) | Urine output last 6 hours (OUTPUT_6HR) | Urine output last 12 hours (OUTPUT_12HR) | Urine output last 24 hours (OUTPUT_24HR) |
| Additional respiratory and hemodynamic support | Vasopressor (VASO)                     | Mechanical ventilation (MECH)            |                                          |                                        |                                          |                                          |
| Primary diagnoses                              | Sepsis, including pneumonia (SEP)      | Cardiovascular (CAR)                     | Neurological (NEU)                       | Other Respiratory (RES)                | Other diseases (OD)                      |                                          |
| Comorbidities                                  | Hypertension (HYP)                     | Diabetes (DIA)                           | Congestive heart failure (CHF)           | Chronic pulmonary disease (CPD)        | Chronic kidney disease (CKD)             | Chronic liver disease (CLD)              |
| Others                                         | Hours stayed in ICU (HOURS)            | Initial SOFA <sup>3</sup> (ISOFA)        |                                          |                                        |                                          |                                          |

192 Table 1. Variables and categorized groups. <sup>1</sup>Body Mass Index: Weight (kg) / Height (meter) \*

193 Height (meter). BMI then converted to classes according to following criteria: BMI < 18.5: class

194 = 0;  $18.5 \leq \text{BMI} < 23$ : class = 1;  $23 \leq \text{BMI} < 25$ : class = 2;  $25 \leq \text{BMI} < 40$ : class = 3;  $\text{BMI} \geq 40$ :  
195 class = 4. <sup>2</sup>P\_F\_ratio: PO<sub>2</sub>/FiO<sub>2</sub>. <sup>3</sup>SOFA: Sequential Organ Failure Assessment.

196

## 197 **Dataset Partitioning and Missing Data Imputation**

198 eICU database was used for model development and the data was analyzed with five-fold  
199 cross-validation: *i.e.*, randomly split the entire cohorts into 60%:20%:20% as training, validation  
200 and testing sets, respectively. The training set (60%) is used for developing machine learning  
201 models, the validation set (20%) helps algorithms find their best hyper-parameters learned by the  
202 training set. The testing set (20%) is used for evaluating the performances of the models learned  
203 and optimized by training and validation sets. To prevent bias introduced when different  
204 admissions of one patient appears in separate dataset, data was splitted according to their unique  
205 patient ID instead of the admission ID, and assigned into either train, validation, or test set, to  
206 ensure patients are mutually exclusive across different datasets.

207 Missing values were imputed with linear imputation approach <sup>69</sup> with respect to each  
208 admission. Once the linear imputation is done, nearest-neighbor imputation <sup>70-72</sup> was adopted  
209 within each admission to fill the remained missing values outside of the linear imputation range.  
210 All imputations were performed piece-wisely on each single admission. As linear imputation was  
211 adopted, it is critical to avoid data leakage on the validation and testing datasets. In our scenario,  
212 each variable on each admission in validation and testing sets are either partially missing or  
213 complete, otherwise that admission will be dropped. We then let those admissions impute the  
214 missing value by itself instead of using the training set. Moreover, the onset of AKI is occurred  
215 at the last timestamp of each admission since the data after the onset of AKI or at the time of

216 AKI were not used in model-building, thus, the experiment will not have the data leakage issue  
217 on time and will not bias the prediction after the data imputation.

218 Data were coded as multi-dimensional time-series at one-hour interval<sup>66</sup>. Static variables  
219 (demographic information, primary diagnosis, comorbidities, and ISOFA) were replicated across  
220 all timestamps for each patient. Categorical features with multiple categories but without order  
221 information, such as “ethnicity”, were one-hot encoded by using “OneHotEncoder” function  
222 from scikit-learn package<sup>63</sup>. Vital signs and laboratory values with multiple measurements  
223 within one-hour interval were pooled in average<sup>66</sup> and rounded to the nearest unit hour.

224

## 225 **Model Development and Validation**

226 Driven by the large population database, we used eight different machine learning  
227 algorithms to develop our early AKI prediction model. The algorithms include: logistic  
228 regression (baseline), random forest (RF)<sup>73</sup>, AdaBoost (short for Adaptive Boosting, base  
229 estimator: decision tree with maximum depth = 1)<sup>74</sup>, decision tree (DT), Gradient Boost  
230 Machine (GBM)<sup>75</sup>, neural network (NN), L2 regularized neural network (NN-L2), and long  
231 short-term memory (LSTM) neural networks<sup>76</sup>. Then we used MIMIC-III database for external  
232 validation. Time-series data were encoded and reshaped to 1-D vectors to feed the learning  
233 algorithms except for LSTM. Hyper-parameters are fine-tuned for each algorithm on validation  
234 set. The entire workflow is shown in Figure 2.

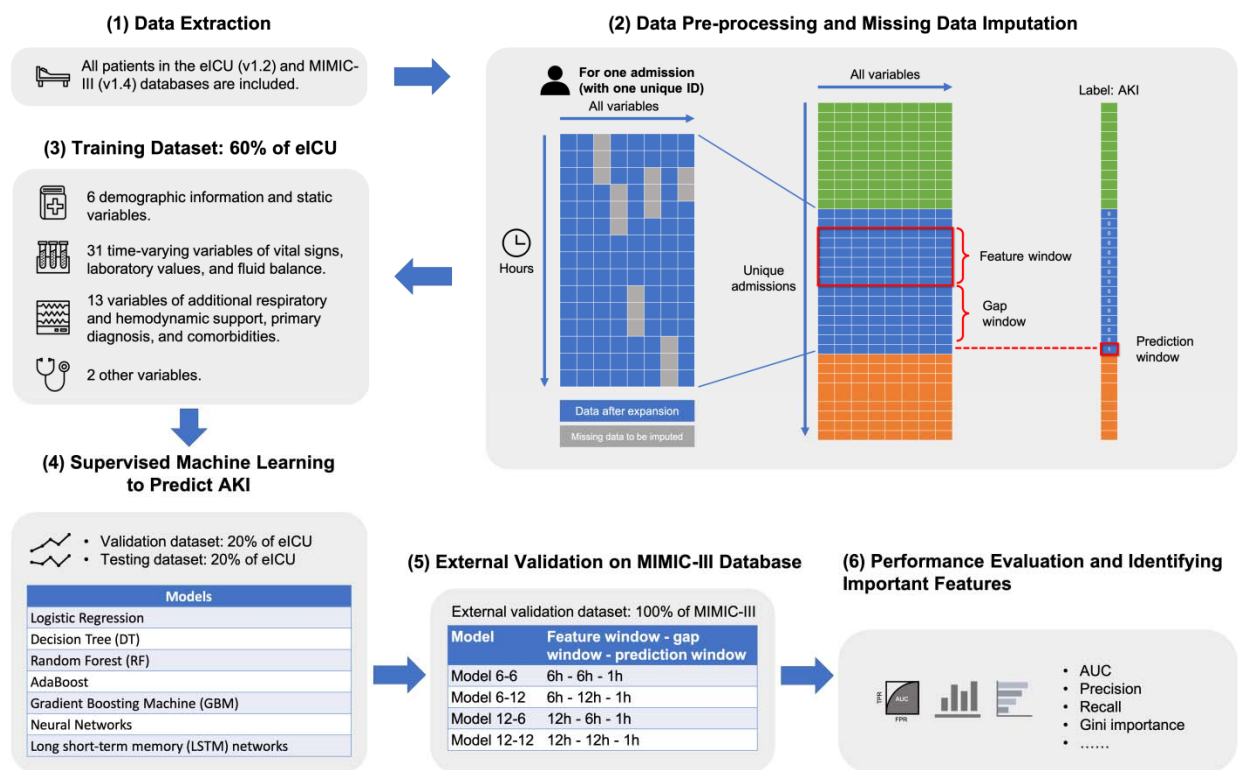

235

236 Figure 2. The study overview of the artificial intelligence-assisted AKI early warning system,  
 237 including (1) Data extraction, (2) Data pre-processing and missing data imputation, (3) dataset  
 238 splitting, (4) supervised machine learning method to predict AKI, (5) external validation, and (6)  
 239 performance evaluation and important feature identification

240

## 241 Performance Evaluation and Statistical Analysis

242 As logistic regression was widely used in predicting time-series events for ICU-related problems  
 243 <sup>26, 54, 66</sup>, we used logistic regression as the baseline for comparisons. Performances was evaluated  
 244 by: 1) the area under the ROC curve (AUC) <sup>77</sup>; 2) Precision (macro) <sup>78</sup>; 3) Recall (macro) <sup>78</sup>; 4)  
 245 F1 score (macro) <sup>79</sup>; 5) negative predictive value <sup>80</sup>; and 6) specificity <sup>81</sup>. AUC, ranging from 0  
 246 to 1, the higher the better, indicates the algorithm's performances. We considered the model with

247 AUC above 0.85 as the adequate and well-performed model. Model with the highest AUC is  
248 considered as the best model. Precision, also known as positive predictive value (PPV)<sup>80</sup>, is the  
249 fraction of true positive classification among the positive results classified by algorithm, a higher  
250 precision indicates an algorithm's result is reliable. Recall, also known as sensitivity<sup>81</sup>, is the  
251 fraction of true positive classification among all the true samples, describes the ability of  
252 identifying true samples (AKI) among the whole population. F1 score is the harmonic average of  
253 precision and recall, higher F1 score indicates better performance. As we reported PPV  
254 (precision) and sensitivity (recall), we also took negative predictive value (NPV) and specificity  
255 into account. NPV is the probability that an admission with a negative prediction truly don't have  
256 the AKI. Specificity measures the proportion of actual negatives samples that are correctly  
257 identified. Since five-fold cross-validation training scheme was adopted which has five different  
258 mutually exclusive testing sets (each contains 20% of the entire cohort), thus all the performance  
259 metrics are computed 5 times. Results are either presented by mean values in Tables or by  
260 boxplot in Figures.

261

## 262 **Results**

### 263 **Study Cohorts: eICU and MIMIC-III**

264 A total of 3,816 unique admissions of eICU database and 5,975 unique admissions of MIMIC-III  
265 database were included after data pre-processing and filtering by inclusion and exclusion criteria.  
266 Detailed inclusion and exclusion process are presented in Figure 3.



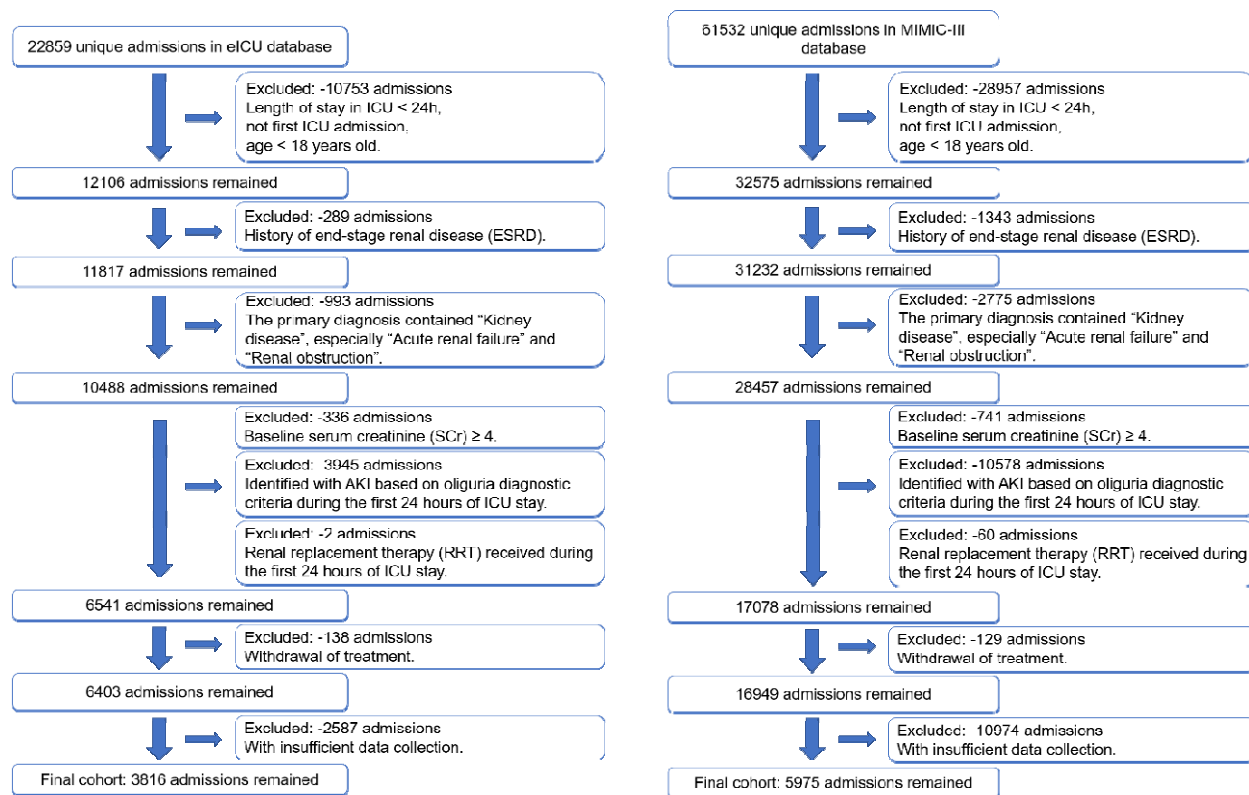

267

**A**

**B**

268 Figure 3. Study cohort selection workflow of eICU (A) and MIMIC-III database (B) based on the  
269 designed inclusion and exclusion criteria.

270

271 Descriptions and statistics of patients' demographics and clinical characteristics between  
272 two cohorts are summarized in Table 2. Commonly missing features are also described in Table  
273 S2. The eICU cohort contained 3,816 unique admissions with a mean age of 60 (standard  
274 deviation=18.0); 56.8% (n=2,169) were male and 84.8% (n=3,234) were white (including  
275 Eastern European, Brazilian, Russian, and other European). 5,975 unique admissions selected in  
276 the final MIMIC-III cohort with a mean age of 60 (standard deviation=18.3); 57.0% (n=3,404)  
277 were men and 69.3% (n=4,140) were white. The incidence of AKI within the first week in eICU

278 and MIMIC-III cohorts was 52.1% (n=1,988) and 31.3% (n=1,870), respectively. The AKI cases  
 279 were determined based on urine output criteria in eICU and MIMIC-III cohorts were 45.1%  
 280 (n=1,722) and 24.9% (n=1,486). Sepsis, including pneumonia, as the primary diagnosis  
 281 accounted for 18.7% (n=713) in eICU cohort and 38.39% (n=2,290) in MIMIC-III cohort.  
 282 Cardiovascular disease accounted for 35.8% (n=1367) in eICU cohort and 25.6% (n=1,531) in  
 283 MIMIC-III cohort. The proportion of patients on mechanical ventilation and vasopressors were  
 284 33.4% (n=1,276) and 26.4% (n=1,006) in the eICU, 47.4% (n=2,830) and 27.9% (n=1,666) in  
 285 the MIMIC-III. The proportion of patients on cardiac surgery prior to AKI were 3.9% (n=149) in  
 286 the eICU and 2.0% (n=122) in the MIMIC-III. The mean ISOFA score was 5.8 (standard  
 287 deviation=3.3) in the eICU and 4.1 (standard deviation=3.0) in the MIMIC-III. The need for  
 288 renal replacement therapy (RRT) was 1.8% (n=68) in the eICU and 0.95% (n=57) in the MIMIC-  
 289 III. Median ICU length of stay was 2.6 days in eICU and 2.8 days in MIMIC-III. The proportion  
 290 of ICU mortality was 10.0% in eICU and 8.6% in MIMIC-III.

| <b>Key Characteristics</b>                                      | <b>eICU</b>   | <b>MIMIC-III</b> |
|-----------------------------------------------------------------|---------------|------------------|
| Unique ICU types (n)                                            | 8             | 5                |
| Final cohort (n)                                                | 3,816         | 5,975            |
| The incidence of AKI within the first week (n(%))               | 1,988 (52.1%) | 1,870 (31.3%)    |
| AKI cases were determined based on urine output criteria (n(%)) | 1722 (45.1%)  | 1486 (24.9%)     |
| Age, years (mean (s.d.))                                        | 60 (18.0)     | 60 (18.3)        |
| Male gender (n(%))                                              | 2,169 (56.8%) | 3,404 (57.0%)    |
| Comorbidities (n(%)):                                           |               |                  |
| Hypertension                                                    | 1,625 (42.6%) | 2,430 (40.7%)    |

|                                                 |               |               |
|-------------------------------------------------|---------------|---------------|
| Diabetes                                        | 527 (13.8%)   | 1,253 (21.0%) |
| Congestive heart failure                        | 593 (15.5%)   | 1,172 (19.6%) |
| Chronic pulmonary disease                       | 550 (14.4%)   | 795 (13.3%)   |
| Chronic kidney disease                          | 379 (10.0%)   | 395 (6.6%)    |
| Chronic liver disease                           | 201 (5.3%)    | 108 (1.8%)    |
| <b>Primary ICD-9 diagnosis (n(%)):</b>          |               |               |
| Sepsis, including pneumonia                     | 713 (18.7%)   | 2,290 (38.3%) |
| Cardiovascular                                  | 1,367 (35.8%) | 1,531 (25.6%) |
| Other Respiratory                               | 670 (17.6%)   | 642 (10.7%)   |
| Neurological                                    | 401 (10.5%)   | 280 (4.7%)    |
| Others                                          | 665 (17.4%)   | 1,232 (20.6%) |
| <b>Ethnicity (n(%)):</b>                        |               |               |
| Black                                           | 264 (6.9%)    | 420 (7.0%)    |
| Hispanic                                        | 66 (1.7%)     | 273 (4.6%)    |
| Asian                                           | 38 (1.0%)     | 202 (3.4%)    |
| White                                           | 3,234 (84.8%) | 4,140 (69.3%) |
| Other                                           | 214 (5.6%)    | 940 (15.7%)   |
| Initial SOFA (mean (s.d.))                      | 5.8 (3.3)     | 4.1 (3.0)     |
| Cardiac surgery (n(%))                          | 149 (3.9%)    | 122 (2.0%)    |
| Mechanical ventilation (n(%))                   | 1,276 (33.4%) | 2,830 (47.4%) |
| Vasopressors (n(%))                             | 1,006 (26.4%) | 1,666 (27.9%) |
| Need for renal replacement therapy (RRT) (n(%)) | 68 (1.8%)     | 57 (0.95%)    |
| Length of stay, days (median, (IQR))            | 2.6 (1.6-4.8) | 2.8 (1.8-5.0) |
| ICU mortality rate                              | 10.00%        | 8.60%         |

291

292 Table 2. Description of the datasets. Ethnicity of Black includes African American, Cape  
293 Verdean, Haitian, and African. Ethnicity of Hispanic includes Latino (central American), Latino  
294 (Cuban), Latino (Puerto Rican), Latino (Honduran), Latino (Guatemalan), Latino (Mexican),  
295 Latino (Dominican), Latino (Salvadoran), Latino (Colombian), and Portuguese. Ethnicity of  
296 Asian includes Vietnamese, Thai, Asian Indian, middle Eastern, Korean, Chinese, Filipino,  
297 Cambodian, Japanese, Asian other. White includes Eastern European, Brazilian, Russian, and  
298 other European. Ethnicity of Other includes Unknown, not specified, multi race, patient declined  
299 to answer, and unable to obtain. s.d.: Standard deviation in short. IQR: interquartile range in  
300 short.

301

### 302 **Model Development and Evaluation in eICU Cohort**

303 Compared with the baseline algorithm (logistic regression algorithm) in eICU cohort, we found  
304 that AdaBoost and Gradient Boosting Machine (GBM) achieved higher AUC than other  
305 algorithms in predicting task of all four configurations of the time-series models. The model 6-6  
306 configuration in general yielded the highest performance. Using model 6-6, the AUC of logistic  
307 regression is 0.8385, while the AUC was higher in the AdaBoost (0.8859) and GBM (0.8522).  
308 AUC results of all five-fold cross validation across four different configurations of the time-  
309 series models and eight different machine learning algorithms are shown in Figure 4A. Precision  
310 and Recall of the models are also demonstrated in Figure S1A and Figure S2A. The model  
311 performance (mean values) on eICU cohort testing sets is shown in Table 3. Other performance

312 metrics on eICU cohort testing sets MIMIC-III such as F1 score, negative predictive value  
313 (NPV), and specificity are also available at Table S3.

### 314 **Model External Validation and Evaluation in MIMIC-III Cohort**

315 After external validation on four configurations of the time-series models which developed by  
316 eight different machine learning algorithms, we found model 12-6 developed by AdaBoost  
317 achieved the highest AUC (0.9228) on external validation set. For some models, the higher  
318 performance is noted on external validation than model development stage due to the differences  
319 between eICU and MIMIC-III cohorts (for example, the onset of AKI in MIMIC-III is more  
320 imbalanced), yet the evaluations are comparable within each database cohorts. AUC results of all  
321 five-folds results across four different configurations of the time-series models and eight  
322 different machine learning algorithms on MIMIC-III external validation set are presented in  
323 Figure 4B. The model performances (mean values) on external validation cohort MIMIC-III of  
324 AUC, precision, and recall are shown in Table 4. Other performance metrics on external  
325 validation cohort MIMIC-III such as F1 score, negative predictive value (NPV), and specificity  
326 are also available at Table S4.

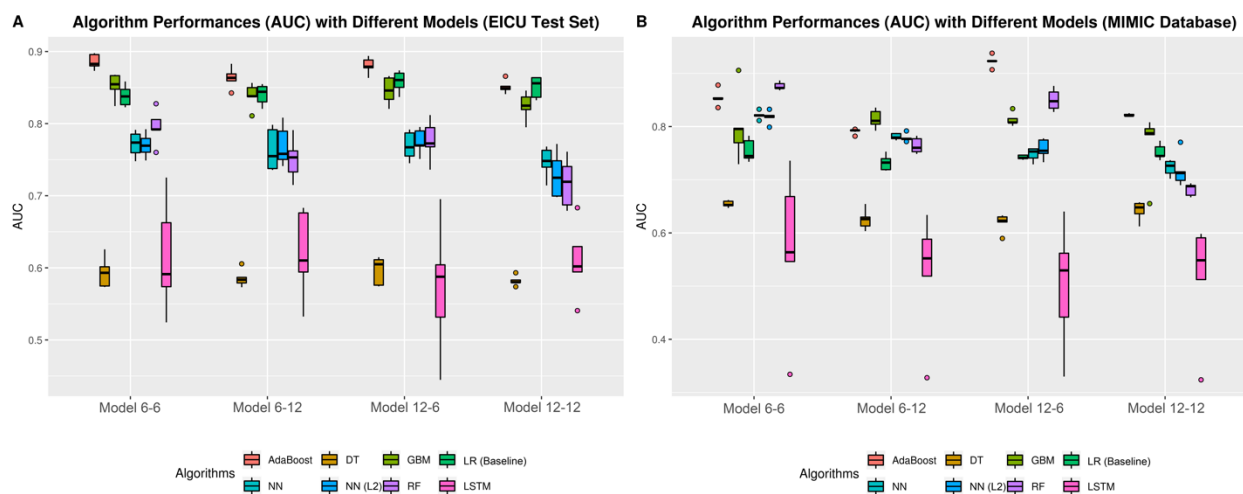

327

328 Figure 4. Performance of four different configurations of the time-series models (model 6-6,  
 329 model 6-12, model 12-6, model 12-12) and eight different machine learning algorithms on eICU  
 330 for model development (A) and MIMIC-III for external validation (B). Abbreviations: DT:  
 331 Decision Tree; GBM: Gradient Boosting Machine; LR: Logistic Regression; NN: Neural  
 332 Networks; NN (L2): Neural Networks with L2 regularization; RF: Random Forest; LSTM: Long  
 333 short-term memory networks.

334

| Models and algorithms | Logistic Regression (Baseline) | Decision tree (DT) | AdaBoost      | Gradient Boosting Machine (GBM) | Random forest (RF) | Neural Networks (NN) | Neural Networks (NN with L2) | Long short-term memory networks (LSTM) |
|-----------------------|--------------------------------|--------------------|---------------|---------------------------------|--------------------|----------------------|------------------------------|----------------------------------------|
| <b>Model 6-6</b>      |                                |                    |               |                                 |                    |                      |                              |                                        |
| AUC                   | 0.8385                         | 0.5937             | <b>0.8859</b> | 0.8522                          | 0.7954             | 0.7716               | 0.7701                       | 0.6154                                 |
| Precision             | 0.6934                         | 0.5209             | <b>0.7381</b> | 0.5430                          | 0.5503             | 0.5328               | 0.5295                       | 0.5056                                 |
| Recall                | 0.5353                         | 0.5937             | 0.5762        | 0.5307                          | 0.5262             | <b>0.6016</b>        | 0.5975                       | 0.5492                                 |
| <b>Model 6-12</b>     |                                |                    |               |                                 |                    |                      |                              |                                        |
| AUC                   | 0.8402                         | 0.5856             | <b>0.8634</b> | 0.8385                          | 0.7509             | 0.7636               | 0.7695                       | 0.6192                                 |
| Precision             | 0.7051                         | 0.5185             | <b>0.7073</b> | 0.5707                          | 0.5437             | 0.5377               | 0.5370                       | 0.5002                                 |
| Recall                | 0.5380                         | 0.5856             | 0.5814        | 0.5551                          | 0.5197             | 0.6014               | <b>0.6040</b>                | 0.5094                                 |
| <b>Model 12-6</b>     |                                |                    |               |                                 |                    |                      |                              |                                        |
| AUC                   | 0.8583                         | 0.5962             | <b>0.8804</b> | 0.8459                          | 0.7766             | 0.7692               | 0.7751                       | 0.5727                                 |
| Precision             | 0.7152                         | 0.5229             | <b>0.7339</b> | 0.5742                          | 0.5504             | 0.5269               | 0.5307                       | 0.5022                                 |
| Recall                | 0.5524                         | 0.5962             | 0.5913        | 0.5584                          | 0.5301             | 0.6147               | <b>0.6262</b>                | 0.5151                                 |
| <b>Model 12-12</b>    |                                |                    |               |                                 |                    |                      |                              |                                        |

|           |        |        |               |        |        |               |        |        |
|-----------|--------|--------|---------------|--------|--------|---------------|--------|--------|
| AUC       | 0.8505 | 0.5820 | <b>0.8509</b> | 0.8244 | 0.7175 | 0.7467        | 0.7286 | 0.6100 |
| Precision | 0.6997 | 0.5187 | <b>0.7412</b> | 0.5746 | 0.5454 | 0.5249        | 0.5198 | 0.5005 |
| Recall    | 0.5443 | 0.5820 | 0.5784        | 0.5496 | 0.5177 | <b>0.6076</b> | 0.5931 | 0.5098 |

335

336 Table 3. Comparison of model performance (mean values across five-fold validation results) on  
 337 eICU internal validation. Abbreviations: AUC: area under the ROC curve. L2 stands for Ridge  
 338 regularization.

339

| <b>Models and algorithms</b> | Logistic Regression (Baseline) | Decision tree (DT) | AdaBoost      | Gradient Boosting Machine (GBM) | Random forest (RF) | Neural Networks (NN) | Neural Networks (NN with L2) | Long short-term memory networks (LSTM) |
|------------------------------|--------------------------------|--------------------|---------------|---------------------------------|--------------------|----------------------|------------------------------|----------------------------------------|
| <b>Model 6-6</b>             |                                |                    |               |                                 |                    |                      |                              |                                        |
| AUC                          | 0.7550                         | 0.6544             | 0.8542        | 0.7993                          | <b>0.8760</b>      | 0.8213               | 0.8175                       | 0.5696                                 |
| Precision                    | 0.5018                         | 0.5123             | 0.5103        | 0.5059                          | 0.5558             | 0.5073               | 0.5071                       | <b>0.5638</b>                          |
| Recall                       | 0.5395                         | 0.6544             | 0.5006        | 0.5648                          | 0.5692             | 0.6857               | <b>0.6886</b>                | 0.5267                                 |
| <b>Model 6-12</b>            |                                |                    |               |                                 |                    |                      |                              |                                        |
| AUC                          | 0.7322                         | 0.6253             | 0.7911        | <b>0.8142</b>                   | 0.7642             | 0.7811               | 0.7788                       | 0.5241                                 |
| Precision                    | 0.5018                         | 0.5080             | 0.5039        | 0.5108                          | <b>0.5449</b>      | 0.5064               | 0.5064                       | 0.5268                                 |
| Recall                       | 0.5387                         | 0.6253             | 0.5017        | 0.5987                          | 0.6241             | <b>0.6690</b>        | 0.6647                       | 0.5136                                 |
| <b>Model 12-6</b>            |                                |                    |               |                                 |                    |                      |                              |                                        |
| AUC                          | 0.7422                         | 0.6192             | <b>0.9228</b> | 0.8131                          | 0.8502             | 0.7479               | 0.7579                       | 0.5006                                 |
| Precision                    | 0.5019                         | 0.5077             | 0.5044        | 0.5076                          | <b>0.5593</b>      | 0.5047               | 0.5051                       | 0.5343                                 |
| Recall                       | 0.5412                         | 0.6192             | 0.5014        | 0.6005                          | 0.6291             | 0.6695               | <b>0.6773</b>                | 0.5077                                 |

| <b>Model 12-12</b> |        |        |               |        |        |               |        |               |
|--------------------|--------|--------|---------------|--------|--------|---------------|--------|---------------|
| AUC                | 0.7522 | 0.6419 | <b>0.8215</b> | 0.7662 | 0.6816 | 0.7224        | 0.7173 | 0.5147        |
| Precision          | 0.5022 | 0.5095 | 0.5038        | 0.5066 | 0.5213 | 0.5044        | 0.5043 | <b>0.5250</b> |
| Recall             | 0.5451 | 0.6419 | 0.5011        | 0.5792 | 0.6223 | <b>0.6512</b> | 0.6459 | 0.5140        |

340

341 Table 4. Comparison of model performance (mean values across five-fold validation results) on  
342 MIMIC-III cohort for external validation. Abbreviations: AUC: area under the ROC curve. L2  
343 stands for Ridge regularization.

344

### 345 **Secondary Outcomes**

346 Secondary outcomes of eICU and MIMIC-III databases are summarized in Table 5. P-value is  
347 derived according to alternative hypothesis: true Spearman  $\rho$  is not equal to 0 when comparing  
348 the variable with the onset of AKI. The patients who were diagnosed with AKI within the first  
349 week of ICU were associated with higher ICU mortality (eICU: 261 (13.1%) vs 121 (6.6%),  
350 spearman  $\rho = 0.1083$ ,  $p < 0.01$ ; MIMIC-III: 284 (15.2%) vs 230 (5.6%), spearman  $\rho = 0.1585$ ,  
351  $p < 0.01$ ), renal replacement therapy (RRT) (eICU: 63 (3.2%) vs 5 (0.3%), spearman  $\rho = 0.1093$ ,  
352  $p < 0.01$ ; MIMIC-III: 47 (2.5%) vs 10 (0.2%), spearman  $\rho = 0.1083$ ,  $p < 0.01$ ), longer ICU length  
353 of stay (eICU: median=3.1 (2.2-3.9) vs median=2.0 (1.1-2.5), spearman  $\rho = 0.2738$ ,  $p < 0.01$ ;  
354 MIMIC-III: median=4.8 (IQR: 3.5-5.8) vs median=2.2 (IQR: 1.2-2.6), spearman  $\rho = 0.4185$ ,  
355  $p < 0.01$ ), and larger ISOFA score (eICU: mean=6.2 (standard deviation=3.4) vs mean=5.3  
356 (standard deviation=3.1), spearman  $\rho = 0.1229$ ,  $p < 0.01$ ; MIMIC-III: mean=4.9 (standard  
357 deviation=3.3) vs mean=3.8 (standard deviation=2.8), spearman  $\rho = 0.1623$ ,  $p < 0.01$ ).



| Groups and outcomes                           | eICU                                    |                                             |                            | MIMIC-III                               |                                             |                            |
|-----------------------------------------------|-----------------------------------------|---------------------------------------------|----------------------------|-----------------------------------------|---------------------------------------------|----------------------------|
|                                               | AKI occurred within first week (n=1988) | AKI not occurred within first week (n=1828) | Spearman $\rho$ (P-value*) | AKI occurred within first week (n=1870) | AKI not occurred within first week (n=4105) | Spearman $\rho$ (P-value*) |
| <b>ICU mortality (n(%))</b>                   | 261 (13.1%)                             | 121 (6.6%)                                  | 0.1083 (p<0.01)            | 284 (15.2%)                             | 230 (5.6%)                                  | 0.1585 (p<0.01)            |
| <b>Renal Replacement Therapy (RRT) (n(%))</b> | 63 (3.2%)                               | 5 (0.3%)                                    | 0.1093 (p<0.01)            | 47 (2.5%)                               | 10 (0.2%)                                   | 0.1083 (p<0.01)            |
| <b>Length of stay, days (median (IQR))</b>    | 3.1 (2.2-3.9)                           | 2.0 (1.1-2.5)                               | 0.2738 (p<0.01)            | 4.8 (3.5-5.8)                           | 2.2 (1.2-2.6)                               | 0.4185 (p<0.01)            |
| <b>Initial SOFA (mean (s.d.))</b>             | 6.2 (3.4)                               | 5.3(3.1)                                    | 0.1229 (p<0.01)            | 4.9 (3.3)                               | 3.8 (2.8)                                   | 0.1623 (p<0.01)            |

358

359 Table 5. Secondary outcomes of eICU and MIMIC-III databases. s.d.: standard deviation in short.

360 IQR: interquartile range in short. \*P-value is derived according to alternative hypothesis: true

361 Spearman  $\rho$  is not equal to 0 when comparing the variable with the onset of AKI.

362

363

### 364 Relationships between Prediction Performances and Different Time-Series Models

365 As eight different algorithms with five-fold cross-validation produces 40 results per each time

366 series model (model 6-6, model 6-12, model 12-6, model 12-12), violin plot (Figure 5) and

367 pairwise paired t-test (Table 6) are used to compare the overall performances across time series

368 models. In figure 5, we demonstrated that given fixed feature collecting window, models with

369 closer gap tend to have better AUC in average and in pairwise paired t-test (model 6-6: 0.7653 >  
370 model 6-12: 0.7539, p-value: 0.0238; model 12-6: 0.7593 > model 6-12: 0.7388, p-value:  
371 0.0218). Moreover, with fixed gap window, models with shorter feature collecting window also  
372 tend to have better AUC in average and in pairwise paired t-test (model 6-6: 0.7653 > model 12-  
373 6: 0.7593, p-value: 0.459; model 6-12: 0.7539 > model 12-12: 0.7388, p-value: 0.0227). Such  
374 findings suggest that the prediction performance improved with closer gaps, while increasing the  
375 lag of time-series data doesn't improve the model performances.

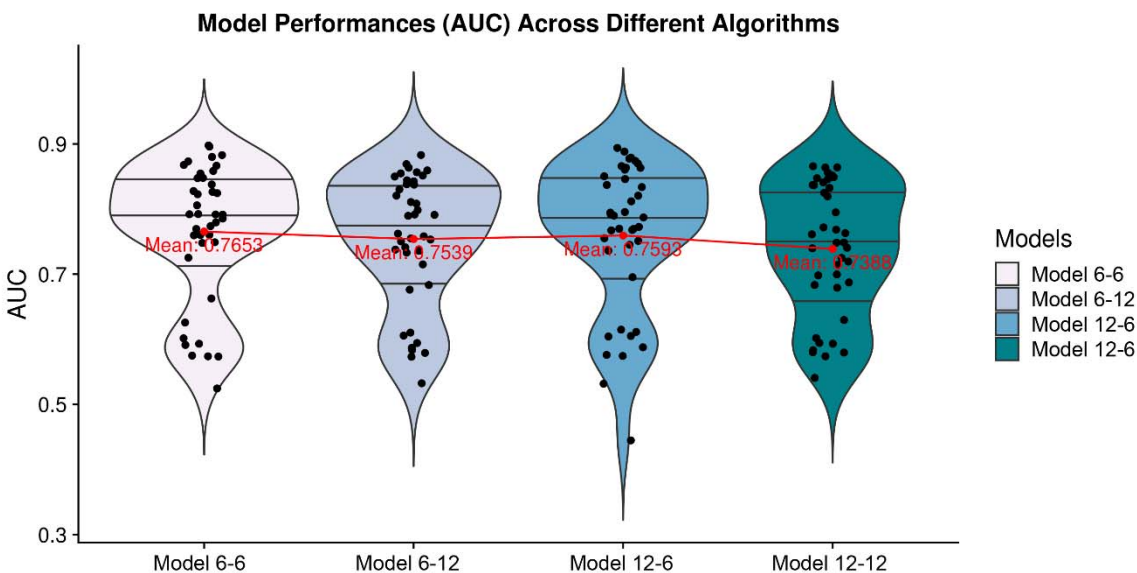

376  
377 Figure 5. Model performances (AUC) violin plot of four different configurations of the models  
378 (model 6-6, model 6-12, model 12-6, model 12-12) across eight different algorithms with five-  
379 fold cross-validation. Black solid horizontal lines in each violin plot are the interquartile range  
380 lines. Red points and lines indicate the mean performances (AUC) over four models.

381

|  |       |
|--|-------|
|  | Set 2 |
|--|-------|

|                                                                                                                                                              |             | Model 6-6 |           | Model 6-12 |           | Model 12-6 |           | Model 12-12 |           |
|--------------------------------------------------------------------------------------------------------------------------------------------------------------|-------------|-----------|-----------|------------|-----------|------------|-----------|-------------|-----------|
|                                                                                                                                                              |             | t         | P         | t          | P         | t          | P         | t           | P         |
| Set<br>1                                                                                                                                                     | Model 6-6   | -         | -         | 2.35       | 2.38E-02* | 0.75       | 4.59E-01  | 4.22        | 1.40E-04* |
|                                                                                                                                                              | Model 6-12  | -2.35     | 2.38E-02* | -          | -         | -0.73      | 4.71E-01  | 2.37        | 2.27E-02* |
|                                                                                                                                                              | Model 12-6  | -0.75     | 4.59E-01  | 0.73       | 4.71E-01  | -          | -         | 2.39        | 2.18E-02* |
|                                                                                                                                                              | Model 12-12 | -4.22     | 1.40E-04* | -2.37      | 2.27E-02* | -2.39      | 2.18E-02* | -           | -         |
| Notes: t denotes the pairwise paired Student's t-test statistic, P denotes the p-value obtained. P-value < 0.05 are significant and indicated with * symbol. |             |           |           |            |           |            |           |             |           |

382

383 Table 6. Pairwise paired t-test comparison among the five-fold cross-validation AUC results over  
384 four different time-series models.

385

### 386 **Identifying Feature Importance**

387 The feature importance identified by the AdaBoost algorithm is determined by the average  
388 feature importance over all ensembled trees. We categorized eight groups of features and  
389 analyzed feature importance by Gini importance (mean decrease impurity). The list of  
390 categorized groups is shown in Table 1.

391 To gain insights into the relevance of each feature, Figure 6 summarized and ranked the  
392 most critical variables in model 6-6 based on the averaged Gini feature importance using  
393 AdaBoost algorithm in model development (eICU database). Note that vitals, labs, topics and  
394 static data are important for the prediction task, and the most important group of features was  
395 vital signs. Specifically, fluid balance-related features (OUTPUT\_12HR, OUTPUT\_6HR,  
396 INPUT\_12HR, OUTPUT\_24HR), AST, AG, SCr, UN, CA\_ION, K\_ION in the class of

397 laboratory values, SYS\_BP, RR, HR in the class of vital signs, HOURS in the class of others,  
 398 and WEIGHT in the class of Demographic, are the most important predictors for the early AKI  
 399 prediction.

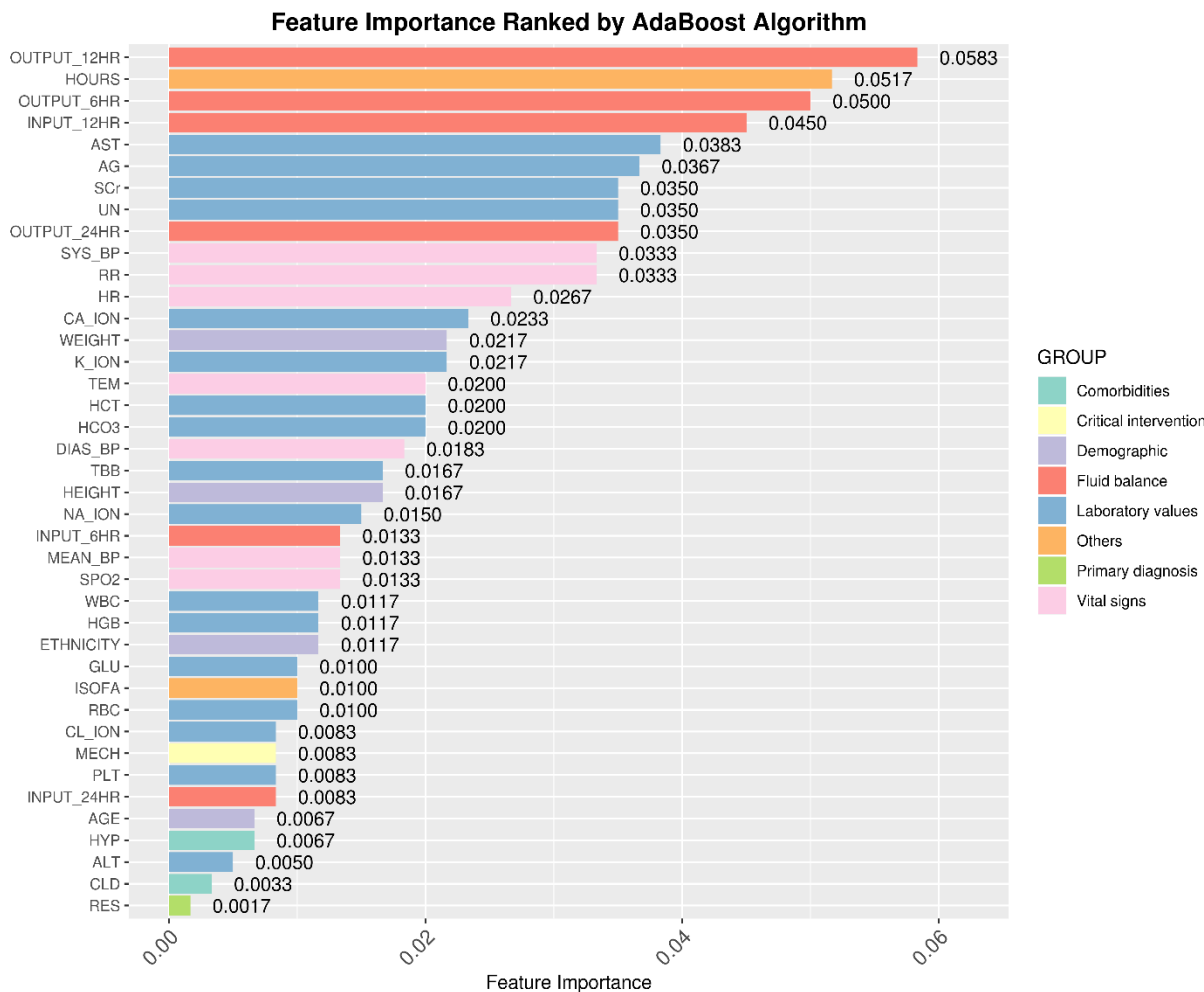

400  
 401 Figure 6. Identified top important features in eICU database. Values and rankings are based on  
 402 time-series model 6-6 and the averaged Gini importance from AdaBoost algorithm. Features are  
 403 colored group-wisely according to the categories listed in Table 1. The higher value indicates the  
 404 higher significance of the feature.

405

## 406 Discussion

407 Electronic healthcare systems (EHR) provides real-world clinical data not only for secondary  
408 analysis, but also for developing the artificial intelligence-based platform to assist clinicians to  
409 identify potential critical events, such as the onset of AKI<sup>82-84</sup>. Since there is no effective  
410 treatment of AKI, the prevention of AKI becomes more critical<sup>2, 59, 85-89</sup>, thus an early warning  
411 system which may reduce the risk of exacerbating injury is necessary and in urgent demand.

412 Though some studies on early warning system have been successfully reduced the  
413 nephrotoxic medication in AKI and prevented the contrast-induced AKI<sup>90-92</sup>, several other  
414 studies showed the failure of those methods<sup>93-95</sup>, which mainly due to the lack of external  
415 validation. Therefore, the study with external validation are necessary before any developed  
416 method be applied to the clinical setting, especially the externally validated prediction models  
417 are relatively rare<sup>19, 42, 56</sup>.

418 In this paper, we have integrated most of the routinely available ICU data based on two  
419 large ICU databases with general population to developed and externally validated an ideal  
420 artificial intelligence assisted early warning system for predicting the onset of AKI within the  
421 first week of ICU stay. Our workflow and time-series models addressed several topics that have  
422 been discussing over these days. For example, we used both oliguric and SCr as diagnostic  
423 criteria of the KDIGO to identify the onset of AKI and included most of physiological and  
424 laboratory parameters as predictors, which contained different clinical commonly used urine  
425 output trends. As a result, we have got an ideal incidence of AKI in both eICU and MIMIC-III  
426 cohort, which would minimize the potential mistakes and maximize the accuracy and improving  
427 of predicting model performance in clinical situation. Moreover, we fully made use of all

428 routinely available ICU and clinical features as predictors, to optimize and improve the model  
429 performances.

430 Using multiple types of ICU and clinical features to predict AKI, a complex clinical  
431 syndrome, is very challenging and difficult as any feature or small changes may cause great  
432 impact on outcomes. Machine learning technique has been successfully applied to predict critical  
433 events under a fast-paced, data-overloaded setting of ICU, which could provide new insights into  
434 evidence-based decision support<sup>96-101</sup>. Different machine learning algorithms usually used to  
435 capture the real relationships across different data types which may provide advantages for  
436 predicting AKI far in advance of onset with high sensitivity and specificity. As previous studies,  
437 many machine learning algorithms have been used training many ideal models in predicting AKI,  
438 such as random forest, multivariate regression model, boosted ensembles of decision trees, etc.<sup>26,</sup>  
439<sup>31, 59</sup>. Based on these previous studies, we take a further step by fully utilizing two independent  
440 databases and applied eight machine learning algorithms with 52 comprehensive features of  
441 different data types for a large-scale model assessments and analyses.

442 Our current study has several strengths. First, we integrated most of the routinely  
443 available ICU data, including 52 features under different data types, which would be considered  
444 containing the largest number of predictors. Second, we not only used both urine output and SCr  
445 as diagnostic criteria to identify the onset of AKI, but also included physiological (especially  
446 urine output) and laboratory trends as predictors to improve model performance. Third, we  
447 compared 8 modern machine learning algorithms for further analysis to select the best model of  
448 predicting task. Fourth, we developed and externally validated an ideal model based on two  
449 independent general population ICU databases. Last but not least, we did not only rely on using

450 data at a single time point (admission to hospital), but also combining static and time-varying  
451 variables as a time series dataset to achieve accurate prediction model performance.

452 From the results and performances across four time-series models and various machine  
453 learning algorithms, we proved the feasibility of deploying artificial intelligence assisted early  
454 warning system for AKI prediction. We also showed that AdaBoost, one of the ensemble  
455 machine learning algorithms, could be a desired model to predict the onset of AKI. The  
456 performances measured by AUC is decent and could be applied in real-time to assist clinicians'  
457 decision in the future. While the across-model performances demonstrated that increasing the lag  
458 (feature collecting window), or in another word, how many hours we look back, doesn't help  
459 improve the performance, justified that model 6-6 with 6 hours feature collecting window is  
460 enough for the future AKI inference.

461 For feature importance ranking of AKI prediction, the top 15 features are critical and  
462 closely related to AKI development. We justified and validated that the fluid balance and  
463 laboratory values are not only the AKI criteria of the KDIGO, but also directly associated with  
464 the kidney function (such as OUTPUT\_12HR, OUTPUT\_6HR, INPUT\_12HR, SCr, UN, CA\_  
465 ION, K\_ION, etc.)<sup>54</sup>. Most vital signs, which are used to assess patients' physiological stability,  
466 are important for prediction as the AKI prediction should be in real-time. Hours stayed in ICU  
467 and weight are also indicated as the most important features which have already been reported  
468 that both of them have a great association with AKI<sup>102</sup>. The model developed has the potential  
469 capability of serving as an "alert" for early warning of AKI, which would make the electronic  
470 healthcare systems more artificially intelligence and enable bedside application.

471           Although our study bridged many gaps in AKI forecasting research, this study may still  
472 exist some inevitable limitations to be addressed in the future. First, the AKI is defined with the  
473 baseline creatinine chosen as first in stay, which could miss the true incidence of AKI by up to  
474 30% who already had AKI at that time<sup>103</sup>. However, as we face the limitation of the data, the  
475 safest way for now is to exclude that group of patients with unclear information. Same exclusion  
476 due to the data limitation also happened in the withdrawal of treatment, which contains patients  
477 who did not receive mechanical ventilation and died during ICU stay. Second, we predict the  
478 onset of AKI at any stage, without predicting the precise stage. In the future, multi-class  
479 classification or even regression might be considered instead of binary classification. Third,  
480 comorbidities were included as “static” variables, since they could not be accurately  
481 timestamped due to the limited information of the eICU and MIMIC-III databases. Fourth, the  
482 predictors may need more effort on improving the recall score – with well-performed AUC and  
483 precision, the recall is not so promising due to some positive samples (AKI) are misclassified.  
484 Fifth, although we used two non-overlapping general population ICU databases, both are from  
485 the United States hospitals. Thus, cross-national and multi-background validations are necessary.  
486 Sixth, we only evaluated two feature windows (6 and 12 hours), two gap windows (6 and 12  
487 hours) and one prediction window (1 hour) due to the data and computational limitation. In the  
488 future, we may put more efforts on various time-series models. Last but not the least, study  
489 design in this work relied on retrospective data investigation which may cause missing some  
490 important information than a prospective study and could not have any result about the impact  
491 analysis between model prediction and patients’ outcomes. Therefore, the model also requires  
492 further external validation based on different background populations and may only be used  
493 inside the research arena.



494

## 495 **Conclusion**

496 Recent reviews and comments showed that the prediction of AKI in the ICU is relatively  
497 difficult and with several limitations. To answer these limitations and problems, We have  
498 developed an artificial intelligence assisted early warning model for predicting the onset of AKI  
499 within the first week of ICU stay, which identified by using both oliguric and SCr diagnostic  
500 criteria in multi-center eICU database and externally validated in single-center MIMIC-III  
501 database. We integrated most routinely available ICU data and demonstrated the model with 6  
502 hours feature and 6 hours gap developed by AdaBoost achieved optimal performances measured  
503 with AUC, precision, and recall among 8 prevalent machine learning algorithms.

504

## 505 **Author Contributions:**

506 SH, CF designed the study, conducted the data collection, data analysis, data interpretation, and  
507 wrote the manuscript. SH, CF conducted the data analysis, data interpretation and wrote the  
508 manuscript. LC and WW conducted the data interpretation and reviewed the manuscript. ZZ and  
509 TL designed the study and reviewed the manuscript. KL, LW, and XC conducted the data  
510 interpretation and reviewed the manuscript.

511

## 512 **Data Availability Statement**

513 Datasets are used from the publically available collection of eICU® Collaborative Research  
514 Database (eICU, <https://eicu-crd.mit.edu/>) (v1.2) and Medical Information Mart for Intensive  
515 Care III (MIMIC-III, <https://mimic.physionet.org/>) (v1.4).

516

### 517 **Code Availability Statement**

518 Experiments were conducted with two open-source libraries: the machine learning library scikit-  
519 learn (<https://scikit-learn.org/stable/>), PyTorch (<https://pytorch.org/>), which provides the public  
520 implementations of all listed algorithms. Libraries were called from python 3.7 environment  
521 (<https://www.python.org/>).

522

### 523 **Competing interests**

524 The authors declare no conflict of interests.

## 525 **References**

- 526 1. Bellomo, R, Kellum, JA, Ronco, C: Acute kidney injury. *Lancet*, 380: 756-766, 2012.
- 527 2. Druml, W, Lenz, K, Laggner, AN: Our paper 20 years later: from acute renal failure to acute  
528 kidney injury-the metamorphosis of a syndrome. *Intens Care Med*, 41: 1941-1949, 2015.
- 529 3. Joannidis, M, Metnitz, B, Bauer, P, Schusterschitz, N, Moreno, R, Druml, W, Metnitz, PGH:  
530 Acute kidney injury in critically ill patients classified by AKIN versus RIFLE using the  
531 SAPS 3 database. *Intens Care Med*, 35: 1692-1702, 2009.
- 532 4. Nisula, S, Kaukonen, KM, Vaara, ST, Korhonen, AM, Poukkanen, M, Karlsson, S, Haapio, M,  
533 Inkinen, O, Parviainen, I, Suojaranta-Ylinen, R, Laurila, JJ, Tenhunen, J, Reinikainen, M,  
534 Ala-Kokko, T, Ruokonen, E, Kuitunen, A, Pettila, V, Grp, FS: Incidence, risk factors and  
535 90-day mortality of patients with acute kidney injury in Finnish intensive care units: the  
536 FINNAKI study. *Intens Care Med*, 39: 420-428, 2013.
- 537 5. Susantitaphong, P, Cruz, DN, Cerda, J, Abulfaraj, M, Alqahtani, F, Koulouridis, I, Jaber, BL,  
538 Nephrology, AS: World Incidence of AKI: A Meta-Analysis. *Clin J Am Soc Nephro*, 8:  
539 1482-1493, 2013.
- 540 6. Sutherland, SM, Chawla, LS, Kane-Gill, SL, Hsu, RK, Kramer, AA, Goldstein, SL, Kellum,  
541 JA, Ronco, C, Bagshaw, SM, Group, AC: Utilizing electronic health records to predict  
542 acute kidney injury risk and outcomes: workgroup statements from the 15(th) ADQI  
543 Consensus Conference. *Can J Kidney Health Dis*, 3: 11, 2016.
- 544 7. Perinel, S, Vincent, F, Lautrette, A, Dellamonica, J, Mariat, C, Zeni, F, Cohen, Y, Tardy, B,  
545 Souweine, B, Darmon, M: Transient and Persistent Acute Kidney Injury and the Risk of

- 546 Hospital Mortality in Critically Ill Patients: Results of a Multicenter Cohort Study. *Crit*  
547 *Care Med*, 43: e269-275, 2015.
- 548 8. Chertow, GM, Burdick, E, Honour, M, Bonventre, JV, Bates, DW: Acute kidney injury,  
549 mortality, length of stay, and costs in hospitalized patients. *J Am Soc Nephrol*, 16: 3365-  
550 3370, 2005.
- 551 9. Levy, EM, Viscoli, CM, Horwitz, RI: The effect of acute renal failure on mortality. A cohort  
552 analysis. *JAMA*, 275: 1489-1494, 1996.
- 553 10. Bellazzi, R, Zupan, B: Predictive data mining in clinical medicine: current issues and  
554 guidelines. *Int J Med Inform*, 77: 81-97, 2008.
- 555 11. Prowle, JR, Liu, YL, Licari, E, Bagshaw, SM, Egi, M, Haase, M, Haase-Fielitz, A, Kellum,  
556 JA, Cruz, D, Ronco, C, Tsutsui, K, Uchino, S, Bellomo, R: Oliguria as predictive  
557 biomarker of acute kidney injury in critically ill patients. *Crit Care*, 15, 2011.
- 558 12. Ostermann, M, Joannidis, M: Acute kidney injury 2016: diagnosis and diagnostic workup.  
559 *Crit Care*, 20, 2016.
- 560 13. Lehner, GF, Forni, LG, Joannidis, M: Oliguria and Biomarkers of Acute Kidney Injury: Star  
561 Struck Lovers or Strangers in the Night? *Nephron*, 134: 183-190, 2016.
- 562 14. Waikar, SS, Bonventre, JV: Creatinine Kinetics and the Definition of Acute Kidney Injury.  
563 *Journal of the American Society of Nephrology*, 20: 672-679, 2009.
- 564 15. Bove, T, Zangrillo, A, Guarracino, F, Alvaro, G, Persi, B, Maglioni, E, Galdieri, N, Comis, M,  
565 Caramelli, F, Pasero, DC, Pala, G, Renzini, M, Conte, M, Paternoster, G, Martinez, B,  
566 Pinelli, F, Frontini, M, Zucchetti, MC, Pappalardo, F, Amantea, B, Camata, A, Pisano, A,

- 567 Verdecchia, C, Dal Checco, E, Cariello, C, Faita, L, Baldassarri, R, Scandroglio, AM,  
568 Saleh, O, Lembo, R, Calabro, MG, Bellomo, R, Landoni, G: Effect of Fenoldopam on  
569 Use of Renal Replacement Therapy Among Patients With Acute Kidney Injury After  
570 Cardiac Surgery A Randomized Clinical Trial. *Jama-J Am Med Assoc*, 312: 2244-2253,  
571 2014.
- 572 16. Kashani, K, Cheungpasitporn, W, Ronco, C: Biomarkers of acute kidney injury: the pathway  
573 from discovery to clinical adoption. *Clin Chem Lab Med*, 55: 1074-1089, 2017.
- 574 17. Ho, JL, Tangri, N, Komenda, P, Kaushal, A, Sood, M, Brar, R, Gill, K, Walker, S,  
575 MacDonald, K, Hiebert, BM, Arora, RC, Rigatto, C: Urinary, Plasma, and Serum  
576 Biomarkers' Utility for Predicting Acute Kidney Injury Associated With Cardiac Surgery  
577 in Adults: A Meta-analysis. *Am J Kidney Dis*, 66: 993-1005, 2015.
- 578 18. Dewitte, A, Joannes-Boyau, O, Sidobre, C, Fleureau, C, Bats, ML, Derache, P, Leuillet, S,  
579 Ripoche, J, Combe, C, Ouattara, A: Kinetic eGFR and Novel AKI Biomarkers to Predict  
580 Renal Recovery. *Clin J Am Soc Nephro*, 10: 1900-1910, 2015.
- 581 19. Darmon, M, Ostermann, M, Joannidis, M: Predictions are difficult ... especially about AKI.  
582 *Intens Care Med*, 43: 932-934, 2017.
- 583 20. (UK), NCGC: Acute Kidney Injury: Prevention, Detection and Management Up to the Point  
584 of Renal Replacement Therapy. In: *Acute Kidney Injury: Prevention, Detection and*  
585 *Management Up to the Point of Renal Replacement Therapy*. London, 2013.
- 586 21. Mehta, RL, Cerda, J, Burdmann, EA, Tonelli, M, Garcia-Garcia, G, Jha, V, Susantitaphong, P,  
587 Rocco, M, Vanholder, R, Sever, MS, Cruz, D, Jaber, B, Lameire, NH, Lombardi, R,

- 588 Lewington, A, Feehally, J, Finkelstein, F, Levin, N, Pannu, N, Thomas, B, Aronoff-  
589 Spencer, E, Remuzzi, G: International Society of Nephrology's Oby25 initiative for acute  
590 kidney injury (zero preventable deaths by 2025): a human rights case for nephrology.  
591 *Lancet*, 385: 2616-2643, 2015.
- 592 22. Huen, SC, Parikh, CR: Predicting acute kidney injury after cardiac surgery: a systematic  
593 review. *Ann Thorac Surg*, 93: 337-347, 2012.
- 594 23. Silver, SA, Shah, PM, Chertow, GM, Harel, S, Wald, R, Harel, Z: Risk prediction models for  
595 contrast induced nephropathy: systematic review. *BMJ*, 351: h4395, 2015.
- 596 24. Caragata, R, Wyssusek, KH, Kruger, P: Acute kidney injury following liver transplantation: a  
597 systematic review of published predictive models. *Anaesth Intensive Care*, 44: 251-261,  
598 2016.
- 599 25. Wilson, T, Quan, S, Cheema, K, Zarnke, K, Quinn, R, de Koning, L, Dixon, E, Pannu, N,  
600 James, MT: Risk prediction models for acute kidney injury following major noncardiac  
601 surgery: systematic review. *Nephrol Dial Transplant*, 31: 231-240, 2016.
- 602 26. Flechet, M, Guiza, F, Schetz, M, Wouters, P, Vanhorebeek, I, Derese, I, Gunst, J, Spriet, I,  
603 Casaer, M, Van den Berghe, G, Meyfroidt, G: AKIpredictor, an online prognostic  
604 calculator for acute kidney injury in adult critically ill patients: development, validation  
605 and comparison to serum neutrophil gelatinase-associated lipocalin. *Intensive care*  
606 *medicine*, 43: 764-773, 2017.
- 607 27. Pannu, N, Graham, M, Klarenbach, S, Meyer, S, Kieser, T, Hemmelgarn, B, Ye, F, James, M,  
608 Investigators, A, the Alberta Kidney Disease, N: A new model to predict acute kidney

- 609 injury requiring renal replacement therapy after cardiac surgery. *CMAJ*, 188: 1076-1083,  
610 2016.
- 611 28. Kellum, JA, Sileanu, FE, Murugan, R, Lucko, N, Shaw, AD, Clermont, G: Classifying AKI  
612 by Urine Output versus Serum Creatinine Level. *J Am Soc Nephrol*, 26: 2231-2238, 2015.
- 613 29. Kellum, JA: Diagnostic Criteria for Acute Kidney Injury: Present and Future. *Crit Care Clin*,  
614 31: 621-632, 2015.
- 615 30. Harris, SK, Lewington, AJP, Harrison, DA, Rowan, KM: Relationship between patients'  
616 outcomes and the changes in serum creatinine and urine output and RIFLE classification  
617 in a large critical care cohort database. *Kidney Int*, 88: 369-377, 2015.
- 618 31. Malhotra, R, Kashani, KB, Macedo, E, Kim, J, Bouchard, J, Wynn, S, Li, G, Ohno-Machado,  
619 L, Mehta, R: A risk prediction score for acute kidney injury in the intensive care unit.  
620 *Nephrol Dial Transplant*, 32: 814-822, 2017.
- 621 32. Koyner, JL, Adhikari, R, Edelson, DP, Churpek, MM: Development of a Multicenter Ward-  
622 Based AKI Prediction Model. *Clin J Am Soc Nephrol*, 11: 1935-1943, 2016.
- 623 33. Costa e Silva, VT, de Castro, I, Liano, F, Muriel, A, Rodriguez-Palomares, JR, Yu, L:  
624 Sequential evaluation of prognostic models in the early diagnosis of acute kidney injury  
625 in the intensive care unit. *Kidney Int*, 75: 982-986, 2009.
- 626 34. Al-Jaghbeer, M, Dealmeida, D, Bilderback, A, Ambrosino, R, Kellum, JA: Clinical Decision  
627 Support for In-Hospital AKI. *J Am Soc Nephrol*, 29: 654-660, 2018.
- 628 35. Selby, NM, Casula, A, Lamming, L, Stoves, J, Samarasinghe, Y, Lewington, AJ, Roberts, R,  
629 Shah, N, Johnson, M, Jackson, N, Jones, C, Lenguerrand, E, McDonach, E, Fluck, RJ,

- 630 Mohammed, MA, Caskey, FJ: An Organizational-Level Program of Intervention for AKI:  
631 A Pragmatic Stepped Wedge Cluster Randomized Trial. *J Am Soc Nephrol*, 30: 505-515,  
632 2019.
- 633 36. Tomašev, N, Glorot, X, Rae, JW, Zielinski, M, Askham, H, Saraiva, A, Mottram, A, Meyer, C,  
634 Ravuri, S, Protsyuk, I, Connell, A, Hughes, CO, Karthikesalingam, A, Cornebise, J,  
635 Montgomery, H, Rees, G, Laing, C, Baker, CR, Peterson, K, Reeves, R, Hassabis, D,  
636 King, D, Suleyman, M, Back, T, Nielson, C, Ledsam, JR, Mohamed, S: A clinically  
637 applicable approach to continuous prediction of future acute kidney injury. *Nature*, 572:  
638 116-119, 2019.
- 639 37. Kheterpal, S, Tremper, KK, Heung, M, Rosenberg, AL, Englesbe, M, Shanks, AM, Campbell,  
640 DA, Jr.: Development and validation of an acute kidney injury risk index for patients  
641 undergoing general surgery: results from a national data set. *Anesthesiology*, 110: 505-  
642 515, 2009.
- 643 38. Drawz, PE, Miller, RT, Sehgal, AR: Predicting hospital-acquired acute kidney injury--a case-  
644 controlled study. *Ren Fail*, 30: 848-855, 2008.
- 645 39. Kashani, K, Al-Khafaji, A, Ardiles, T, Artigas, A, Bagshaw, SM, Bell, M, Bihorac, A,  
646 Birkhahn, R, Cely, CM, Chawla, LS, Davison, DL, Feldkamp, T, Forni, LG, Gong, MN,  
647 Gunnerson, KJ, Haase, M, Hackett, J, Honore, PM, Hoste, EA, Joannes-Boyau, O,  
648 Joannidis, M, Kim, P, Koyner, JL, Laskowitz, DT, Lissauer, ME, Marx, G, McCullough,  
649 PA, Mullaney, S, Ostermann, M, Rimmele, T, Shapiro, NI, Shaw, AD, Shi, J, Sprague,  
650 AM, Vincent, JL, Vinsonneau, C, Wagner, L, Walker, MG, Wilkerson, RG, Zacharowski,  
651 K, Kellum, JA: Discovery and validation of cell cycle arrest biomarkers in human acute



- 652 kidney injury. *Crit Care*, 17: R25, 2013.
- 653 40. Chiofalo, C, Chbat, N, Ghosh, E, Eshelman, L, Kashani, K: Automated Continuous Acute  
654 Kidney Injury Prediction and Surveillance: A Random Forest Model. *Mayo Clin Proc*, 94:  
655 783-792, 2019.
- 656 41. Mandelbaum, T, Lee, J, Scott, DJ, Mark, RG, Malhotra, A, Howell, MD, Talmor, D:  
657 Empirical relationships among oliguria, creatinine, mortality, and renal replacement  
658 therapy in the critically ill. *Intens Care Med*, 39: 414-419, 2013.
- 659 42. Hodgson, LE, Sarnowski, A, Roderick, PJ, Dimitrov, BD, Venn, RM, Forni, LG: Systematic  
660 review of prognostic prediction models for acute kidney injury (AKI) in general hospital  
661 populations. *BMJ Open*, 7: e016591, 2017.
- 662 43. Kheterpal, S, Tremper, KK, Englesbe, MJ, O'Reilly, M, Shanks, AM, Fetterman, DM,  
663 Rosenberg, AL, Swartz, RD: Predictors of postoperative acute renal failure after  
664 noncardiac surgery in patients with previously normal renal function. *Anesthesiology*, 107:  
665 892-902, 2007.
- 666 44. Bell, S, Dekker, FW, Vadiveloo, T, Marwick, C, Deshmukh, H, Donnan, PT, Van Diepen, M:  
667 Risk of postoperative acute kidney injury in patients undergoing orthopaedic surgery--  
668 development and validation of a risk score and effect of acute kidney injury on survival:  
669 observational cohort study. *BMJ*, 351: h5639, 2015.
- 670 45. Bedford, M, Stevens, P, Coulton, S, Billings, J, Farr, M, Wheeler, T, Kalli, M, Mottishaw, T,  
671 Farmer, C: Development of risk models for the prediction of new or worsening acute  
672 kidney injury on or during hospital admission: a cohort and nested study. In:

- 673            *Development of risk models for the prediction of new or worsening acute kidney injury on*  
674            *or during hospital admission: a cohort and nested study.* Southampton (UK), 2016.
- 675    46. Forman, DE, Butler, J, Wang, YF, Abraham, WT, O'Connor, CM, Gottlieb, SS, Loh, E,  
676            Massie, BM, Rich, MW, Stevenson, LW, Young, JB, Krumholz, HM: Incidence,  
677            predictors at admission, and impact of worsening renal function among patients  
678            hospitalized with heart failure. *J Am Coll Cardiol*, 43: 61-67, 2004.
- 679    47. Hodgson, LE, Dimitrov, BD, Roderick, PJ, Venn, R, Forni, LG: Predicting AKI in emergency  
680            admissions: an external validation study of the acute kidney injury prediction score (APS).  
681            *Bmj Open*, 7, 2017.
- 682    48. Goldberger, AL, Amaral, LA, Glass, L, Hausdorff, JM, Ivanov, PC, Mark, RG, Mietus, JE,  
683            Moody, GB, Peng, CK, Stanley, HE: PhysioBank, PhysioToolkit, and PhysioNet:  
684            components of a new research resource for complex physiologic signals. *Circulation*, 101:  
685            E215-220, 2000.
- 686    49. Pollard, TJ, Johnson, AEW, Raffa, JD, Celi, LA, Mark, RG, Badawi, O: The eICU  
687            Collaborative Research Database, a freely available multi-center database for critical care  
688            research. *Sci Data*, 5: 180178, 2018.
- 689    50. Johnson, AE, Pollard, TJ, Shen, L, Lehman, LW, Feng, M, Ghassemi, M, Moody, B,  
690            Szolovits, P, Celi, LA, Mark, RG: MIMIC-III, a freely accessible critical care database.  
691            *Sci Data*, 3: 160035, 2016.
- 692    51. Johnson, AE, Stone, DJ, Celi, LA, Pollard, TJ: The MIMIC Code Repository: enabling  
693            reproducibility in critical care research. *J Am Med Inform Assoc*, 25: 32-39, 2018.

- 694 52. Raita, Y, Goto, T, Faridi, MK, Brown, DFM, Camargo, CA, Jr., Hasegawa, K: Emergency  
695 department triage prediction of clinical outcomes using machine learning models. *Crit*  
696 *Care*, 23: 64, 2019.
- 697 53. Serpa Neto, A, Deliberato, RO, Johnson, AEW, Bos, LD, Amorim, P, Pereira, SM, Cazati,  
698 DC, Cordioli, RL, Correa, TD, Pollard, TJ, Schettino, GPP, Timenetsky, KT, Celi, LA,  
699 Pelosi, P, Gama de Abreu, M, Schultz, MJ, Investigators, PN: Mechanical power of  
700 ventilation is associated with mortality in critically ill patients: an analysis of patients in  
701 two observational cohorts. *Intensive Care Med*, 44: 1914-1922, 2018.
- 702 54. Zhang, Z, Ho, KM, Hong, Y: Machine learning for the prediction of volume responsiveness  
703 in patients with oliguric acute kidney injury in critical care. *Crit Care*, 23: 112, 2019.
- 704 55. Thomas, ME, Blaine, C, Dawnay, A, Devonald, MA, Ftouh, S, Laing, C, Latchem, S,  
705 Lewington, A, Milford, DV, Ostermann, M: The definition of acute kidney injury and its  
706 use in practice. *Kidney Int*, 87: 62-73, 2015.
- 707 56. Thomas, ME, Blaine, C, Dawnay, A, Devonald, MAJ, Ftouh, S, Laing, C, Latchem, S,  
708 Lewington, A, Milford, DV, Ostermann, M: The definition of acute kidney injury and its  
709 use in practice. *Kidney Int*, 87: 62-73, 2015.
- 710 57. Wang, YN, Cheng, H, Yue, T, Chen, YP: Derivation and validation of a prediction score for  
711 acute kidney injury in patients hospitalized with acute heart failure in a Chinese cohort.  
712 *Nephrology (Carlton)*, 18: 489-496, 2013.
- 713 58. Forman, DE, Butler, J, Wang, Y, Abraham, WT, O'Connor, CM, Gottlieb, SS, Loh, E, Massie,  
714 BM, Rich, MW, Stevenson, LW, Young, JB, Krumholz, HM: Incidence, predictors at

- 715 admission, and impact of worsening renal function among patients hospitalized with heart  
716 failure. *J Am Coll Cardiol*, 43: 61-67, 2004.
- 717 59. Mohamadlou, H, Lynn-Palevsky, A, Barton, C, Chettipally, U, Shieh, L, Calvert, J, Saber, NR,  
718 Das, R: Prediction of Acute Kidney Injury With a Machine Learning Algorithm Using  
719 Electronic Health Record Data. *Can J Kidney Health Dis*, 5: 2054358118776326, 2018.
- 720 60. Hintze, JL, Nelson, RDJTAS: Violin plots: a box plot-density trace synergism. 52: 181-184,  
721 1998.
- 722 61. Huang, Z, Zhan, X, Xiang, S, Johnson, TS, Helm, B, Yu, CY, Zhang, J, Salama, P, Rizkalla,  
723 M, Han, Z, Huang, K: SALMON: Survival Analysis Learning With Multi-Omics Neural  
724 Networks on Breast Cancer. *Front Genet*, 10: 166, 2019.
- 725 62. Breiman, L: *Classification and regression trees*, Routledge, 2017.
- 726 63. Pedregosa, F, Varoquaux, G, Gramfort, A, Michel, V, Thirion, B, Grisel, O, Blondel, M,  
727 Prettenhofer, P, Weiss, R, Dubourg, VJ: *Scikit-learn: Machine learning in Python*.  
728 12: 2825-2830, 2011.
- 729 64. Revelle, WR: *psych: Procedures for personality and psychological research*. 2017.
- 730 65. Holland, M, Wolfe, D: *Nonparametric statistical methods*. John Wiley & Sons, New York,  
731 1973 pp 185–194.
- 732 66. Suresh, H, Hunt, N, Johnson, A, Celi, LA, Szolovits, P, Ghassemi, M: Clinical intervention  
733 prediction and understanding with deep neural networks. *Machine Learning for  
734 Healthcare Conference*. 2017 pp 322-337.

- 735 67. Chanley, VA, Rudolph, TJ, Rahn, WM: The origins and consequences of public trust in  
736 government: a time series analysis. *Public Opin Q*, 64: 239-256, 2000.
- 737 68. Chiang, AC: Fundamental methods of mathematical economics. *Auckland (New Zealand)*  
738 *McGraw-Hill*, 1984.
- 739 69. Twisk, J, de Vente, WJJoce: Attrition in longitudinal studies: how to deal with missing data.  
740 55: 329-337, 2002.
- 741 70. Shah, JS, Rai, SN, DeFilippis, AP, Hill, BG, Bhatnagar, A, Brock, GN: Distribution based  
742 nearest neighbor imputation for truncated high dimensional data with applications to pre-  
743 clinical and clinical metabolomics studies. *Bmc Bioinformatics*, 18, 2017.
- 744 71. Kim, KY, Kim, BJ, Yi, GS: Reuse of imputed data in microarray analysis increases  
745 imputation efficiency. *Bmc Bioinformatics*, 5, 2004.
- 746 72. Komorowski, M, Celi, L, Badawi, O, Gordon, AC, Faisal, AA: The Artificial Intelligence  
747 Clinician learns optimal treatment strategies for sepsis in intensive care. *Nat Med*, 24:  
748 1716+, 2018.
- 749 73. Liaw, A, Wiener, MJRn: Classification and regression by randomForest. 2: 18-22, 2002.
- 750 74. Freund, Y, Schapire, R, Abe, NJJ-JSFAI: A short introduction to boosting. 14: 1612, 1999.
- 751 75. Friedman, JHJAos: Greedy function approximation: a gradient boosting machine. 1189-1232,  
752 2001.
- 753 76. Hochreiter, S, Schmidhuber, J: Long short-term memory. *Neural Comput*, 9: 1735-1780,  
754 1997.

- 755 77. Bradley, APJPr: The use of the area under the ROC curve in the evaluation of machine  
756 learning algorithms. *30*: 1145-1159, 1997.
- 757 78. Davis, J, Goadrich, M: The relationship between Precision-Recall and ROC curves.  
758 *Proceedings of the 23rd international conference on Machine learning*. ACM, 2006 pp  
759 233-240.
- 760 79. Goutte, C, Gaussier, E: A Probabilistic Interpretation of Precision, Recall and F-Score, with  
761 Implication for Evaluation. Berlin, Heidelberg, Springer Berlin Heidelberg, 2005 pp 345-  
762 359.
- 763 80. Altman, DG, Bland, JM: Diagnostic tests 2: Predictive values. *BMJ*, *309*: 102, 1994.
- 764 81. Altman, DG, Bland, JM: Diagnostic tests. 1: Sensitivity and specificity. *BMJ*, *308*: 1552,  
765 1994.
- 766 82. Vincent, JL: Critical care - where have we been and where are we going? *Crit Care*, *17*, 2013.
- 767 83. Abul-Husn, NS, Kenny, EE: Personalized Medicine and the Power of Electronic Health  
768 Records. *Cell*, *177*: 58-69, 2019.
- 769 84. Jamoom, EW, Yang, N, Hing, E: Adoption of Certified Electronic Health Record Systems  
770 and Electronic Information Sharing in Physician Offices: United States, 2013 and 2014.  
771 *NCHS Data Brief*: 1-8, 2016.
- 772 85. Hoste, E, Bagshaw, S, Bellomo, R, Cely, C, Colman, R, Cruz, D, Edipidis, K, Forni, L,  
773 Gomersall, C, Govil, D, Honore, PM, Joannes-Boyau, O, Joannidis, M, Korhonen, AM,  
774 Lavrentieva, A, Mehta, R, Palevsky, P, Roessler, E, Ronco, C, Uchino, S, Vazquez, J,  
775 Vidal Andrade, E, Webb, S, Kellum, J: Epidemiology of acute kidney injury in critically

- 776 ill patients: the multinational AKI-EPI study. *Intens Care Med*, 41: 1411-1423, 2015.
- 777 86. Schetz, M, Gunst, J, Van den Berghe, G: The impact of using estimated GFR versus  
778 creatinine clearance on the evaluation of recovery from acute kidney injury in the ICU.  
779 *Intens Care Med*, 40: 1709-1717, 2014.
- 780 87. Geri, G, Guillemet, L, Dumas, F, Charpentier, J, Antona, M, Lemiale, V, Bouguin, W,  
781 Lamhaut, L, Mira, JP, Vinsonneau, C, Cariou, A: Acute kidney injury after out-of-hospital  
782 cardiac arrest: risk factors and prognosis in a large cohort. *Intens Care Med*, 41: 1273-  
783 1280, 2015.
- 784 88. O'Connor, ME, Kirwan, CJ, Pearse, RM, Prowle, JR: Incidence and associations of acute  
785 kidney injury after major abdominal surgery. *Intens Care Med*, 42: 521-530, 2016.
- 786 89. Smith, LE, Smith, DK, Blume, JD, Siew, ED, Billings, FT: Latent variable modeling  
787 improves AKI risk factor identification and AKI prediction compared to traditional  
788 methods. *Bmc Nephrol*, 18, 2017.
- 789 90. Rind, DM, Safran, C, Phillips, RS, Wang, Q, Calkins, DR, Delbanco, TL, Bleich, HL, Slack,  
790 WV: Effect of computer-based alerts on the treatment and outcomes of hospitalized  
791 patients. *Arch Intern Med*, 154: 1511-1517, 1994.
- 792 91. McCoy, AB, Waitman, LR, Gadd, CS, Danciu, I, Smith, JP, Lewis, JB, Schildcrout, JS,  
793 Peterson, JF: A computerized provider order entry intervention for medication safety  
794 during acute kidney injury: a quality improvement report. *Am J Kidney Dis*, 56: 832-841,  
795 2010.
- 796 92. Cho, A, Lee, JE, Yoon, JY, Jang, HR, Huh, W, Kim, YG, Kim, DJ, Oh, HY: Effect of an

- 797           electronic alert on risk of contrast-induced acute kidney injury in hospitalized patients  
798           undergoing computed tomography. *Am J Kidney Dis*, 60: 74-81, 2012.
- 799   93. Hooper, MH, Weavind, L, Wheeler, AP, Martin, JB, Gowda, SS, Semler, MW, Hayes, RM,  
800           Albert, DW, Deane, NB, Nian, H, Mathe, JL, Nadas, A, Sztipanovits, J, Miller, A,  
801           Bernard, GR, Rice, TW: Randomized trial of automated, electronic monitoring to  
802           facilitate early detection of sepsis in the intensive care unit\*. *Crit Care Med*, 40: 2096-  
803           2101, 2012.
- 804   94. van der Sijs, H, Aarts, J, Vulto, A, Berg, M: Overriding of drug safety alerts in computerized  
805           physician order entry. *J Am Med Inform Assoc*, 13: 138-147, 2006.
- 806   95. Rosenberg, SN, Sullivan, M, Juster, IA, Jacques, J: Overrides of medication alerts in  
807           ambulatory care. *Arch Intern Med*, 169: 1337; author reply 1338, 2009.
- 808   96. Henry, KE, Hager, DN, Pronovost, PJ, Saria, S: A targeted real-time early warning score  
809           (TREWScore) for septic shock. *Sci Transl Med*, 7, 2015.
- 810   97. ElMoaqet, H, Tilbury, DM, Ramachandran, SK: Multi-Step Ahead Predictions for Critical  
811           Levels in Physiological Time Series. *Ieee T Cybernetics*, 46: 1704-1714, 2016.
- 812   98. Saria, S, Rajani, AK, Gould, J, Koller, D, Penn, AA: Integration of Early Physiological  
813           Responses Predicts Later Illness Severity in Preterm Infants. *Sci Transl Med*, 2, 2010.
- 814   99. Neto, AS, Deliberato, RO, Johnson, AEW, Bos, LD, Amorim, P, Pereira, SM, Cazati, DC,  
815           Cordioli, RL, Correa, TD, Pollard, TJ, Schettino, GPP, Timenetsky, KT, Celi, LA, Pelosi,  
816           P, de Abreu, MG, Schultz, MJ, Investigators, PN: Mechanical power of ventilation is  
817           associated with mortality in critically ill patients: an analysis of patients in two



- 818           observational cohorts. *Intens Care Med*, 44: 1914-1922, 2018.
- 819   100. Ghassemi, M, Pimentel, MA, Naumann, T, Brennan, T, Clifton, DA, Szolovits, P, Feng, M:  
820           A Multivariate Timeseries Modeling Approach to Severity of Illness Assessment and  
821           Forecasting in ICU with Sparse, Heterogeneous Clinical Data. *Proc Conf AAAI Artif*  
822           *Intell*, 2015: 446-453, 2015.
- 823   101. Ghassemi, M, Wu, M, Hughes, MC, Szolovits, P, Doshi-Velez, F: Predicting intervention  
824           onset in the ICU with switching state space models. *AMIA Jt Summits Transl Sci Proc*,  
825           2017: 82-91, 2017.
- 826   102. Danziger, J, Chen, KP, Lee, J, Feng, M, Mark, RG, Celi, LA, Mukamal, KJ: Obesity, Acute  
827           Kidney Injury, and Mortality in Critical Illness. *Crit Care Med*, 44: 328-334, 2016.
- 828   103. Siew, ED, Matheny, ME, Ikizler, TA, Lewis, JB, Miller, RA, Waitman, LR, Go, AS, Parikh,  
829           CR, Peterson, JF: Commonly used surrogates for baseline renal function affect the  
830           classification and prognosis of acute kidney injury. *Kidney Int*, 77: 536-542, 2010.
- 831

## 832 **Figure Legends**

833 Figure 1. Model settings and prediction for a single admission. Timestamp is at one-hour interval.  
834 Feature collecting window are the discretized time-series features (6 hours or 12 hours) as inputs  
835 of machine learning algorithms for predicting the label of AKI after certain gaps (6 hours or 12  
836 hours). We experimented on four different model configurations: model 6-6, model 6-12, model  
837 12-6, and model 12-12.

838 Figure 2. The study overview of the artificial intelligence-assisted AKI early warning system,  
839 including (1) Data extraction, (2) Data pre-processing and missing data imputation, (3) dataset  
840 splitting, (4) supervised machine learning method to predict AKI, (5) external validation, and (6)  
841 performance evaluation and important feature identification.

842 Figure 3. Study cohort selection workflow of eICU (A) and MIMIC-III database (B) based on the  
843 designed inclusion and exclusion criteria.

844 Figure 4. Boxplot of all five-folds recall results across four different configurations of the time-  
845 series models (model 6-6, model 6-12, model 12-6, model 12-12) and eight different machine  
846 learning algorithms on eICU testing set (A) and external validation database MIMIC-III (B).  
847 Abbreviations: DT: Decision Tree; GBM: Gradient Boosting Machine; LR: Logistic Regression;  
848 NN: Neural Networks; NN (L2): Neural Networks with L2 regularization; RF: Random Forest;  
849 LSTM: Long short-term memory networks.

850 Figure 5. Model performances (AUC) violin plot of four different configurations of the models  
851 (model 6-6, model 6-12, model 12-6, model 12-12) across eight different algorithms with five-  
852 fold cross-validation. Black solid horizontal lines in each violin plot are the interquartile range  
853 lines. Red points and lines indicate the mean performances (AUC) over four models.

854 Figure 6. Identified top important features in eICU database. Values and rankings are based on  
855 time-series model 6-6 and the averaged Gini importance from AdaBoost algorithm. Features are  
856 colored group-wisely according to the categories listed in Table 1. The higher value indicates the  
857 higher significance of the feature.

858

## 859 **Table Legends**

860 Table 1. Variables and categorized groups. <sup>1</sup>Body Mass Index: Weight (kg) / Height (meter) \*  
861 Height (meter). BMI then converted to classes according to following criteria: BMI < 18.5: class  
862 = 0;  $18.5 \leq \text{BMI} < 23$ : class = 1;  $23 \leq \text{BMI} < 25$ : class = 2;  $25 \leq \text{BMI} < 40$ : class = 3; BMI  $\geq 40$ :  
863 class = 4. <sup>2</sup>P\_F\_ratio: PO<sub>2</sub>/FiO<sub>2</sub>. <sup>3</sup>SOFA: Sequential Organ Failure Assessment.

864 Table 2. Description of the datasets. Ethnicity of Black includes African American, Cape  
865 Verdean, Haitian, and African. Ethnicity of Hispanic includes Latino (central American), Latino  
866 (Cuban), Latino (Puerto Rican), Latino (Honduran), Latino (Guatemalan), Latino (Mexican),  
867 Latino (Dominican), Latino (Salvadoran), Latino (Colombian), and Portuguese. Ethnicity of  
868 Asian includes Vietnamese, Thai, Asian Indian, middle Eastern, Korean, Chinese, Filipino,  
869 Cambodian, Japanese, Asian other. White includes Eastern European, Brazilian, Russian, and  
870 other European. Ethnicity of Other includes Unknown, not specified, multi race, patient declined  
871 to answer, and unable to obtain. s.d.: Standard deviation in short. IQR: interquartile range in  
872 short.

873 Table 3. Comparison of model performance (mean values across five-fold validation results) in  
874 eICU internal validation. Abbreviations: AUC: area under the ROC curve. L2 stands for Ridge  
875 regularization.

876 Table 4. Comparison of model performance (mean values across five-fold validation results) in  
877 MIMIC-III cohort for external validation. Abbreviations: AUC: area under the ROC curve. L2  
878 stands for Ridge regularization.

879 Table 5. Secondary outcomes of eICU and MIMIC-III databases. s.d.: standard deviation in short.

880 IQR: interquartile range in short. \*P-value is derived according to alternative hypothesis: true

881 Spearman  $\rho$  is not equal to 0 when comparing the variable with the onset of AKI.

882 Table 6. Pairwise paired t-test comparison among the five-fold cross-validation AUC results over

883 four different time-series models.

884 Table S1. eICU and MIMIC-III databases exclusion criteria.

885 Table S2. Most commonly missing features according to all timestamps in eICU database. Total

886 missing count was the count of total missing occurrence of the associated feature. Missing ratio

887 was the ratio of missing observations to the entire observations (427,527 timestamps in total). All

888 abbreviations are referred to eICU and MIMIC-III databases. Features with high missing ratio

889 were dropped.

890 Table S3. Comparison of other performance metrics (mean values across five-fold validation

891 results) on eICU internal validation. Abbreviations: NPV: negative predictive value. L2 stands

892 for Ridge regularization.

893 Table S4. Comparison of other performance metrics (mean values across five-fold validation

894 results) on MIMIC-III cohort for external validation. Abbreviations: NPV: negative predictive

895 value. L2 stands for Ridge regularization.

| Model       | Feature window - gap window - prediction window |
|-------------|-------------------------------------------------|
| Model 6-6   | 6h - 6h - 1h                                    |
| Model 6-12  | 6h - 12h - 1h                                   |
| Model 12-6  | 12h - 6h - 1h                                   |
| Model 12-12 | 12h - 12h - 1h                                  |

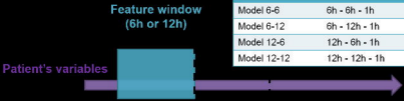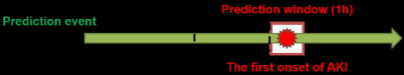

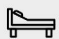

All patients in the eICU (v1.2) and MIMIC-III (v1.4) databases are included.

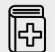

6 demographic information and static variables.

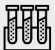

31 time-varying variables of vital signs, laboratory values, and fluid balance.

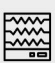

13 variables of additional respiratory and hemodynamic support, primary diagnosis, and comorbidities.

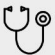

2 other variables.

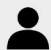

For one admission (with one unique ID)

All variables

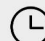

Hours

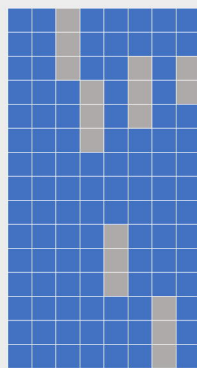

Data after expansion

Missing data to be imputed

Unique admissions

All variables

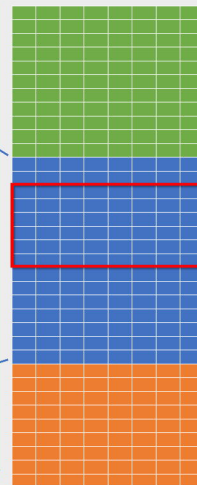

Label: AKI

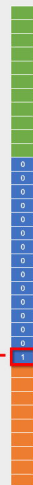

Prediction window

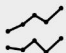

• Validation dataset: 20% of eICU

• Testing dataset: 20% of eICU

### Models

|                                        |
|----------------------------------------|
| Logistic Regression                    |
| Decision Tree (DT)                     |
| Random Forest (RF)                     |
| AdaBoost                               |
| Gradient Boosting Machine (GBM)        |
| Neural Networks                        |
| Long short-term memory (LSTM) networks |

External validation dataset: 100% of MIMIC-III

| Model | Feature window - gap window - prediction window |
|-------|-------------------------------------------------|
|-------|-------------------------------------------------|

|           |              |
|-----------|--------------|
| Model 6-6 | 6h - 6h - 1h |
|-----------|--------------|

|            |               |
|------------|---------------|
| Model 6-12 | 6h - 12h - 1h |
|------------|---------------|

|            |               |
|------------|---------------|
| Model 12-6 | 12h - 6h - 1h |
|------------|---------------|

|             |                |
|-------------|----------------|
| Model 12-12 | 12h - 12h - 1h |
|-------------|----------------|

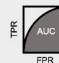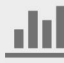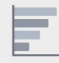

- AUC
- Precision
- Recall
- Gini importance
- .....

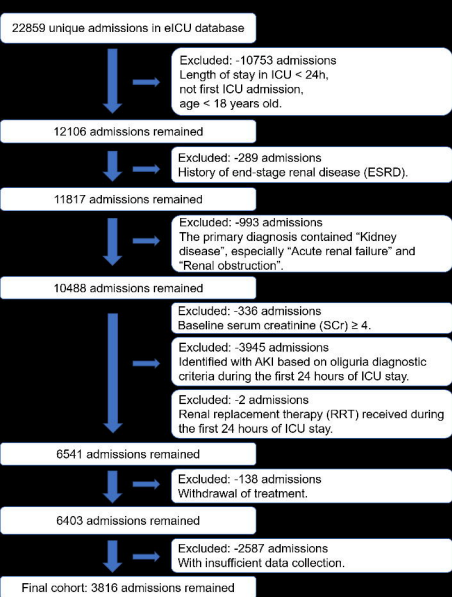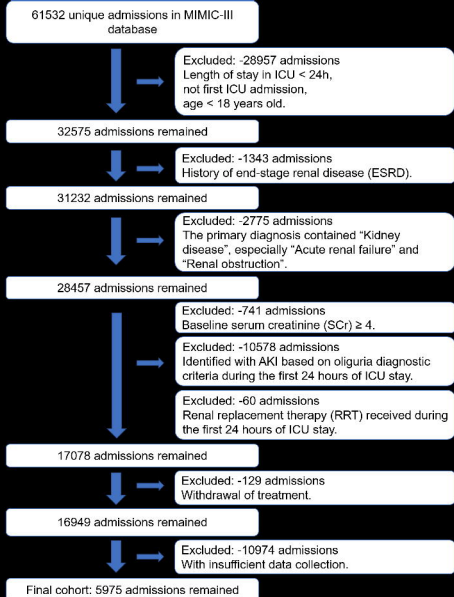



**A Algorithm Performances (AUC) with Different Models (EICU Test Set)**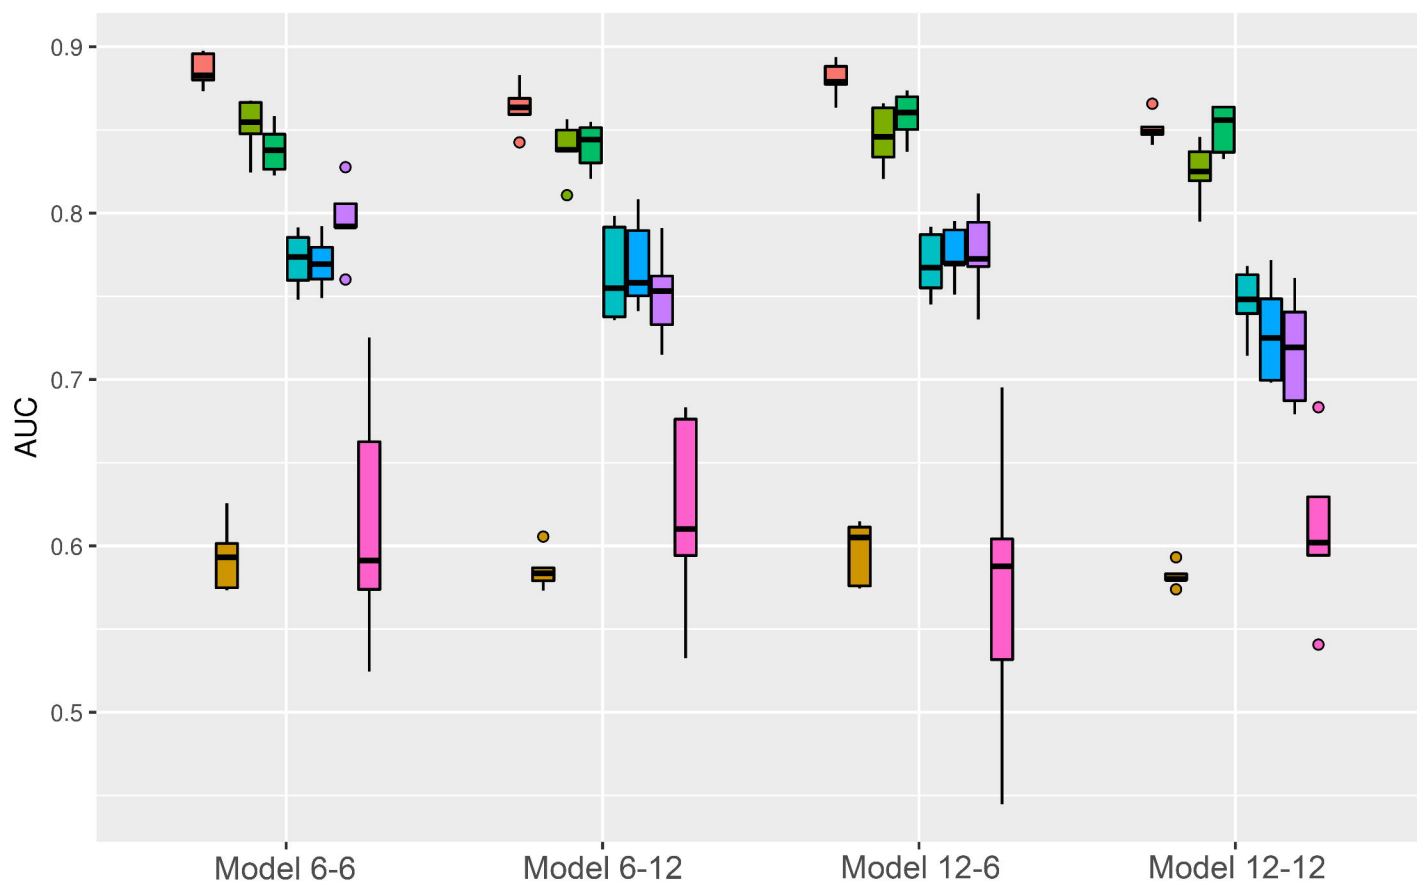

Algorithms

- AdaBoost
- DT
- GBM
- LR (Baseline)
- NN
- NN (L2)
- RF
- LSTM

**B Algorithm Performances (AUC) with Different Models (MIMIC Database)**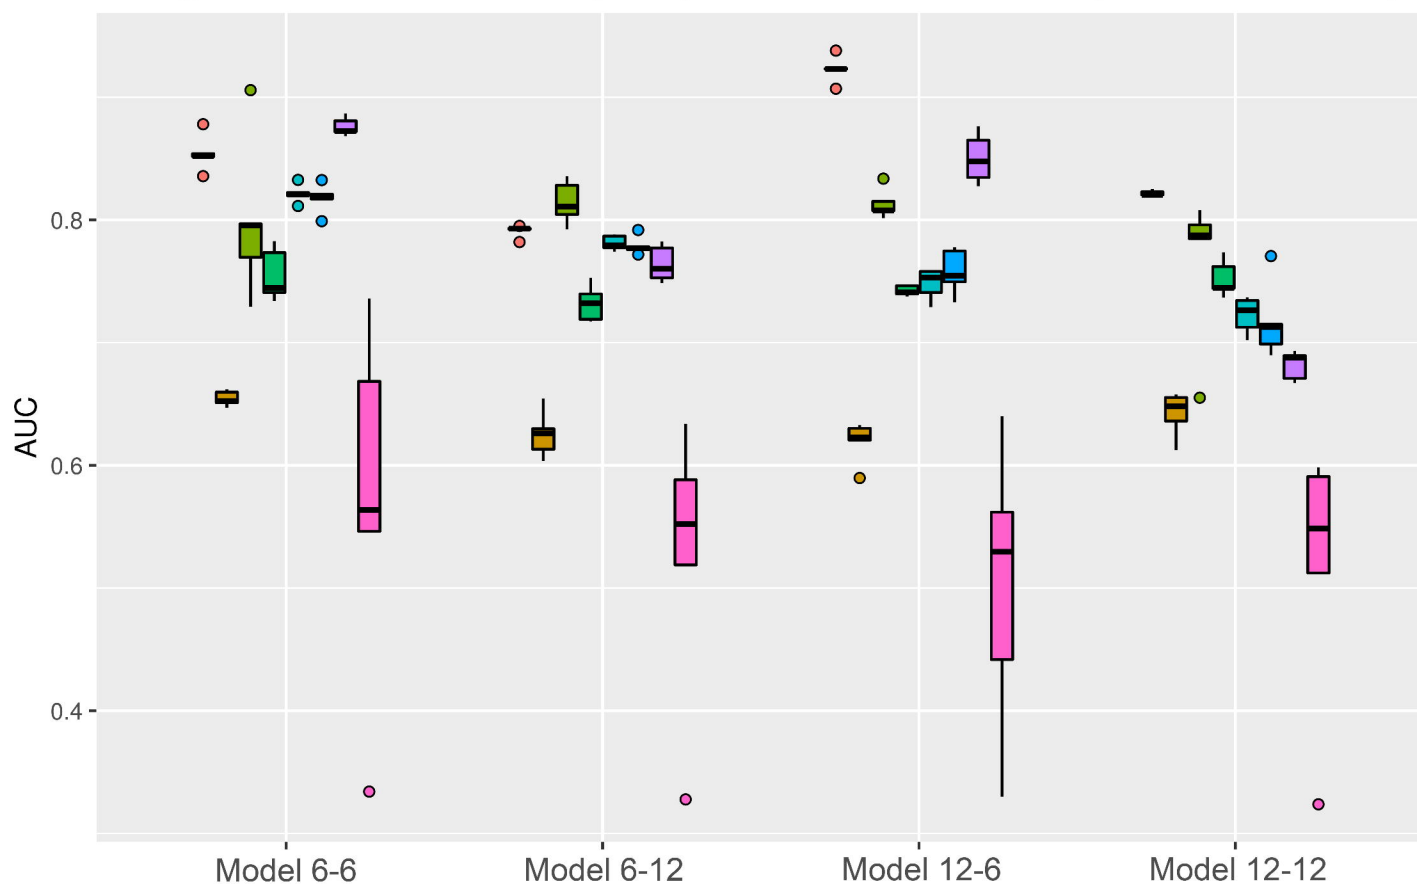

Algorithms

- AdaBoost
- DT
- GBM
- LR (Baseline)
- NN
- NN (L2)
- RF
- LSTM

# Model Performances (AUC) Across Different Algorithms

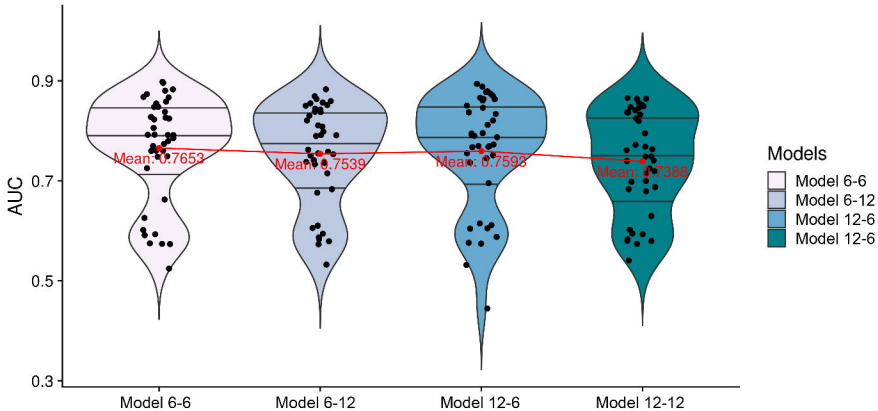

# Feature Importance Ranked by AdaBoost Algorithm

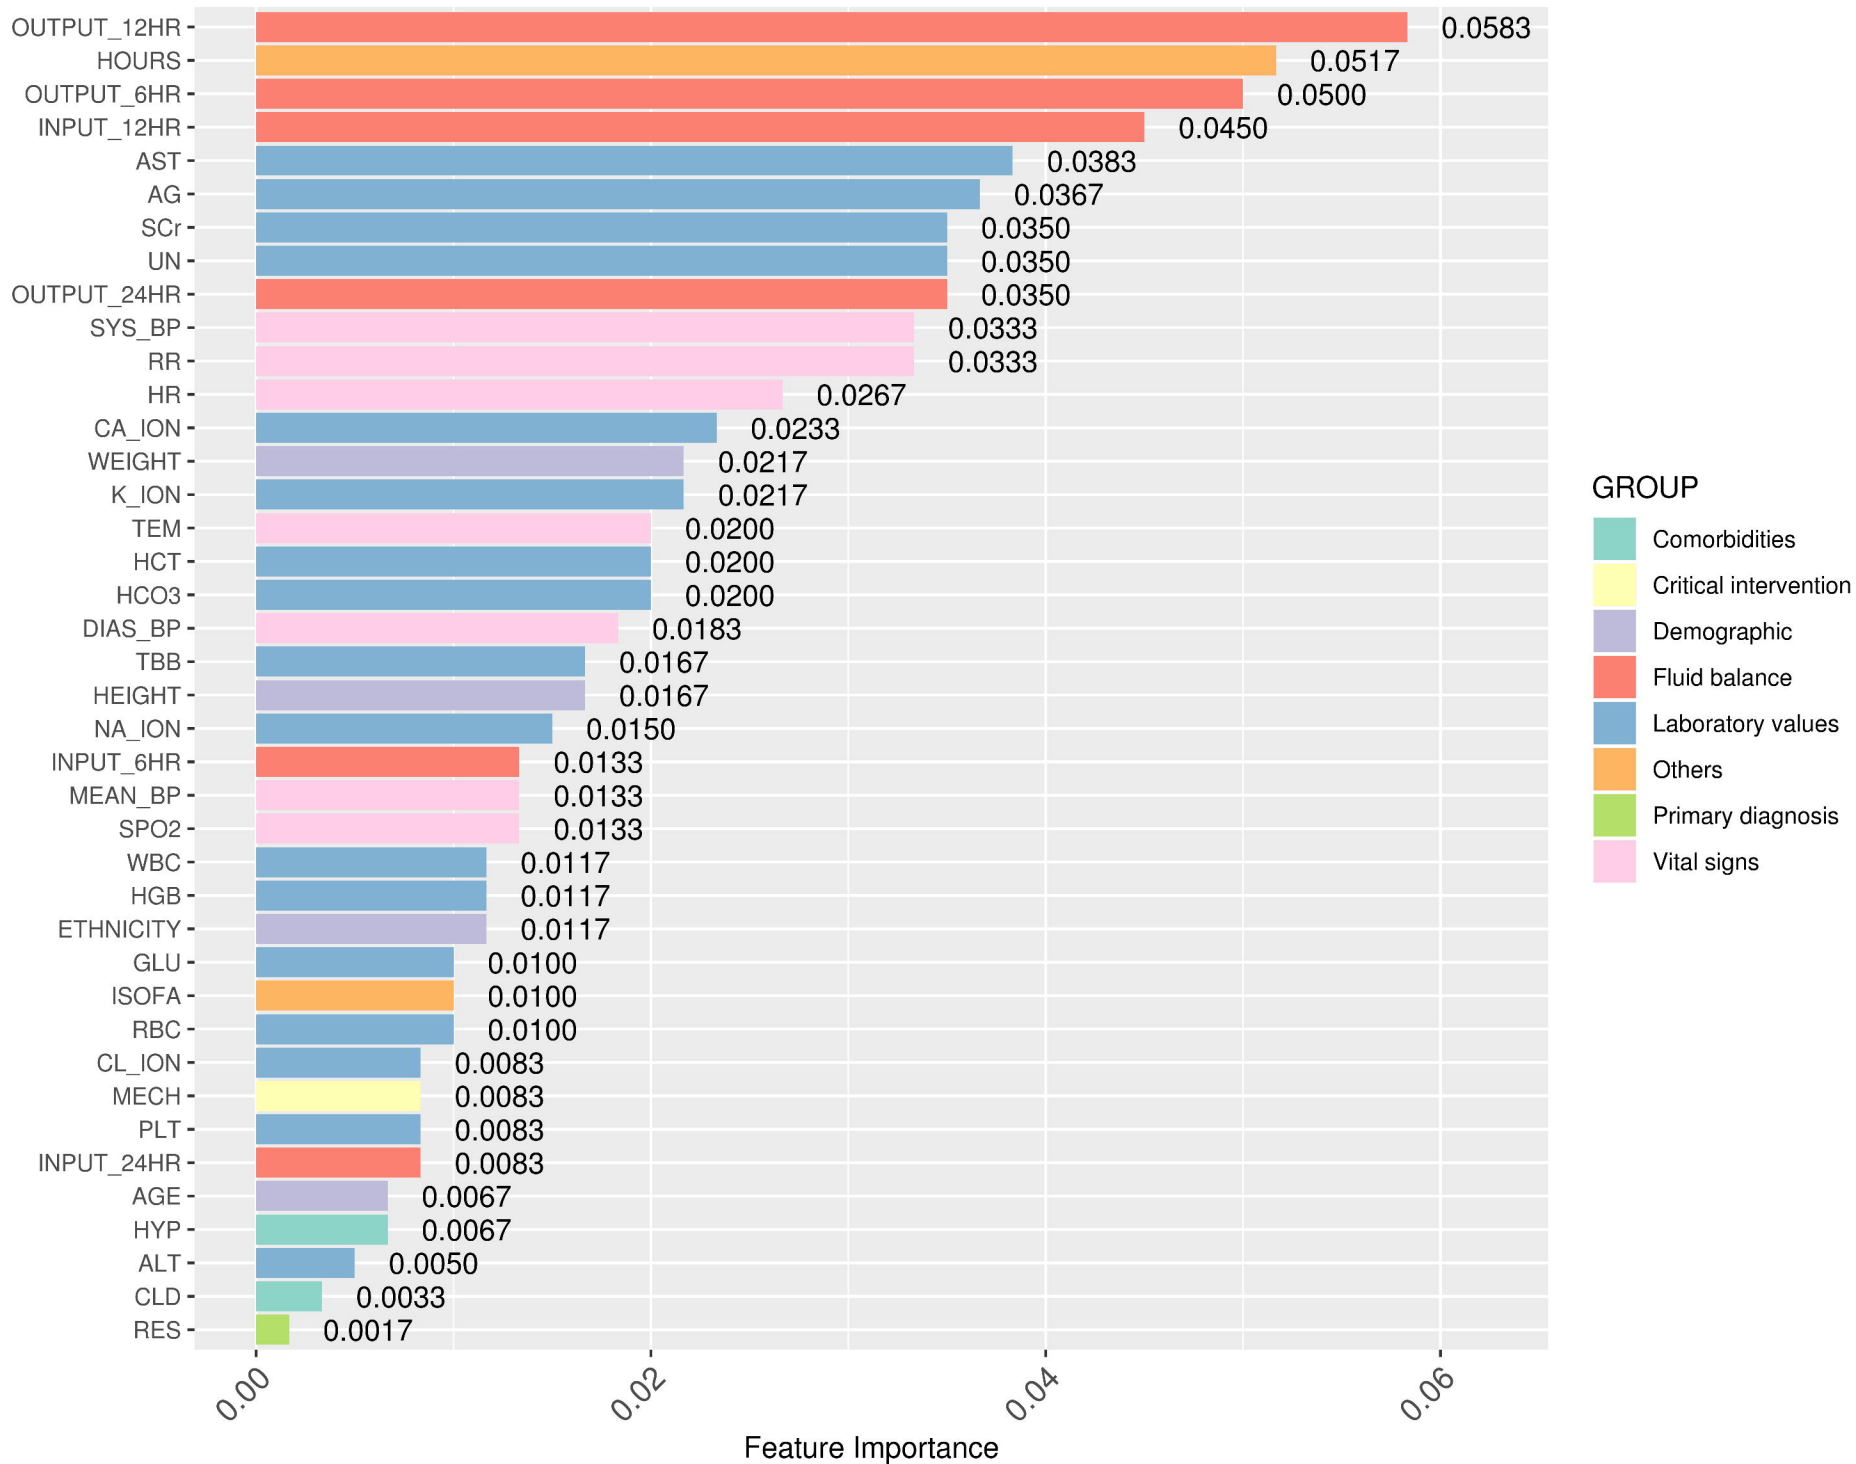

Source: https://www.medrxiv.org/content/10.1101/2020.01.27.20019091v2.full.pdf
